# Supplementary material for: The impact of genotype transformations and aneuploidy on genomic prediction accuracy in polyploid species: a simulation study
Source: Research Square preprint supplement (doi:10.21203/rs.3.rs-5365958/v1), 2024-11-26
Supplement: Supplementary file 1 [file 1aaeab2b002c52211320eee1.xlsx]

## Sheet: Diploid-Transformation
Trait	Model	Tag	meanR	meanMSE	std	lmP	P
Gamma100	A	Ex	0.2256	38337.9	0.137883	0.002	**
Gamma100	AD	Ex	0.2671	34464.6	0.0968796	0.008	**
Gamma100	BayesR	Ex	0.236	32995.7	0.155795	0	***
Gamma100	MLP	Ex	0.256234	22146.7	0.081658	0.002	**
Gamma100	CNN	Ex	0.282132	20842.5	0.107362	0.018	*
Gamma100	Attention	Ex	0.285546	17906.6	0.103232	0.001	**
Log100	A	Ex	0.2039	8126.62	0.101163	0	***
Log100	AD	Ex	0.2257	7934.47	0.0841124	0.001	**
Log100	BayesR	Ex	0.1769	10336.8	0.0906782	0.002	**
Log100	MLP	Ex	0.19173	3339.45	0.103976	0.026	*
Log100	CNN	Ex	0.20788	3326.76	0.0863883	0.012	*
Log100	Attention	Ex	0.209876	3083.28	0.080191	0.009	**
Norm05	MLP	A	0.338114	1096.14	0.0559662	0.013	*
Norm05	Attention	A	0.299068	1062.68	0.0660627	0.074	--
Norm05	AD	A	0.2902	1244.46	0.064496	0.531	--
Norm05	BayesR	A	0.283	1403.17	0.0795613	0.007	**
Norm05	CNN	A	0.280914	1074.8	0.0777111	0.067	--
Norm05	A	A	0.2632	1243.39	0.0600478	0.121	--
Norm05	A	AD	0.2241	38200.6	0.0498251	0.958	--
Norm05	A	ADD	0.1921	64863.6	0.0681933	0.022	*
Norm10	A	AD	0.3195	25670.5	0.0719572	0.071	--
Norm10	A	ADD	0.2094	159747	0.0766104	0.88	--
Norm100	A	AD	0.2104	22210	0.0640246	0.48	--
Norm100	A	ADD	0.2119	101994	0.0464027	0.148	--
Norm30	A	AD	0.2706	36289.8	0.0604377	0.229	--
Norm30	A	ADD	0.1609	148559	0.0978689	0.303	--
Norm60	A	AD	0.2655	38835.1	0.0901114	0.111	--
Norm60	A	ADD	0.2009	250705	0.0727193	0.444	--
Norm05	AD	AD	0.2428	35799.4	0.0493081	0.193	--
Norm05	AD	ADD	0.2224	68440.1	0.0600318	0.42	--
Norm10	Attention	A	0.324284	1988.18	0.0655788	0.012	*
Norm10	AD	A	0.2929	1957.86	0.0518705	0.013	*
Norm10	CNN	A	0.292135	2035.81	0.0810257	0.051	--
Norm10	MLP	A	0.28674	1999.67	0.0893235	0.003	**
Norm10	BayesR	A	0.2714	2119.91	0.109921	0.006	**
Norm10	A	A	0.2548	2104.86	0.0793148	0.008	**
Norm10	AD	AD	0.3401	22726.3	0.0671804	0.146	--
Norm10	AD	ADD	0.224	163118	0.109882	0.649	--
Norm100	AD	AD	0.2321	20885.4	0.062376	0.671	--
Norm100	AD	ADD	0.2351	103272	0.0428575	0.629	--
Norm30	AD	AD	0.2868	28779.8	0.0637091	0.715	--
Norm30	AD	ADD	0.1829	155270	0.119886	0.092	--
Norm60	AD	AD	0.2872	36106.3	0.0950939	0.576	--
Norm60	AD	ADD	0.2213	336411	0.0815721	0.002	**
Norm05	Attention	AD	0.267296	19297.4	0.0588569	0.252	--
Norm05	Attention	ADD	0.269618	43174.5	0.0505858	0.773	--
Norm10	Attention	AD	0.309664	18780.3	0.0607758	0.017	*
Norm10	Attention	ADD	0.261746	29573.5	0.0734047	0.525	--
Norm100	AD	A	0.3117	55226.9	0.0638924	0.098	--
Norm100	Attention	A	0.308133	19104.7	0.0581137	0.003	**
Norm100	CNN	A	0.295329	20490.6	0.0582045	0.001	**
Norm100	A	A	0.2952	53651.6	0.0851584	0.042	*
Norm100	MLP	A	0.282129	25954.5	0.0848947	0.075	--
Norm100	BayesR	A	0.2798	66724.9	0.0938921	0.074	--
Norm100	Attention	AD	0.231975	20848.3	0.0471915	0.443	--
Norm100	Attention	ADD	0.25362	97151.9	0.0515735	0.464	--
Norm30	Attention	AD	0.281941	20694.1	0.0634299	0.339	--
Norm30	Attention	ADD	0.273846	44162.1	0.0696396	0.944	--
Norm60	Attention	AD	0.299179	20629.4	0.0965694	0.407	--
Norm60	Attention	ADD	0.261694	74902.7	0.0522058	0.503	--
Norm05	BayesR	AD	0.2345	34996.2	0.0452505	0.225	--
Norm05	BayesR	ADD	0.1727	99075	0.0805482	0.23	--
Norm10	BayesR	AD	0.3182	21295.5	0.0737907	0.044	*
Norm10	BayesR	ADD	0.2168	182743	0.0710161	0.576	--
Norm100	BayesR	AD	0.1963	23808.2	0.0522304	0.341	--
Norm100	BayesR	ADD	0.2121	133695	0.0554005	0.347	--
Norm30	CNN	A	0.332479	5222.32	0.0736311	0.035	*
Norm30	MLP	A	0.331324	6962.96	0.0874185	0.034	*
Norm30	Attention	A	0.294549	5132.61	0.0848462	0.006	**
Norm30	AD	A	0.2848	4973.14	0.0547698	0.001	**
Norm30	A	A	0.2665	4903.7	0.0695913	0	***
Norm30	BayesR	A	0.2473	5010.86	0.0766986	0.002	**
Norm30	BayesR	AD	0.2603	29798	0.0491439	0.316	--
Norm30	BayesR	ADD	0.1798	178224	0.0991091	0.208	--
Norm60	BayesR	AD	0.2423	36020.7	0.0760819	0.115	--
Norm60	BayesR	ADD	0.1919	343992	0.074994	0.899	--
Norm05	CNN	AD	0.251488	20687.3	0.0615439	0.91	--
Norm05	CNN	ADD	0.253783	22892.5	0.0647727	0.058	--
Norm10	CNN	AD	0.326344	20845.3	0.0663607	0.035	*
Norm10	CNN	ADD	0.292873	35447.6	0.0548075	0.044	*
Norm100	CNN	AD	0.237124	21170.3	0.0670188	0.778	--
Norm100	CNN	ADD	0.251338	103398	0.059319	0.404	--
Norm30	CNN	AD	0.288496	22526.5	0.0428277	0.759	--
Norm30	CNN	ADD	0.279231	46915.3	0.0827346	0.364	--
Norm60	AD	A	0.33	39487.2	0.0495917	0.144	--
Norm60	MLP	A	0.318981	12925.2	0.0739881	0.366	--
Norm60	A	A	0.314	39777.5	0.0732166	0.045	*
Norm60	Attention	A	0.310583	10118.3	0.0707321	0.164	--
Norm60	BayesR	A	0.2832	39722.7	0.0670734	0.261	--
Norm60	CNN	A	0.21505	11913.4	0.113273	0.194	--
Norm60	CNN	AD	0.268187	20975.8	0.0718108	0.429	--
Norm60	CNN	ADD	0.262501	78797.6	0.0658029	0.601	--
Norm05	MLP	AD	0.292599	20631.6	0.0928239	0.454	--
Norm05	MLP	ADD	0.272847	28489.6	0.0908303	0.153	--
Norm10	MLP	AD	0.343721	21338.6	0.0778375	0.24	--
Norm10	MLP	ADD	0.315083	30162.1	0.0568087	0.165	--
Norm100	MLP	AD	0.25698	22957.1	0.0568892	0.696	--
Norm100	MLP	ADD	0.259108	104404	0.076594	0.879	--
Norm30	MLP	AD	0.315379	22264.7	0.0503799	0.534	--
Norm30	MLP	ADD	0.286489	44440.9	0.082561	0.455	--
Norm60	MLP	AD	0.285514	30996.2	0.0742887	0.351	--
Norm60	MLP	ADD	0.319342	76978	0.0387476	0.588	--
Sigmoid100	A	Ex	0.1913	52.6202	0.120216	0.001	**
Sigmoid100	AD	Ex	0.2028	49.9384	0.121127	0.001	**
Sigmoid100	BayesR	Ex	0.1639	61.1463	0.0987752	0.011	*
Sigmoid100	MLP	Ex	0.174356	37.101	0.100592	0.001	**
Sigmoid100	CNN	Ex	0.218873	36.192	0.132419	0.002	**
Sigmoid100	Attention	Ex	0.156848	35.5457	0.104453	0.007	**
