# Supplementary material for: The impact of genotype transformations and aneuploidy on genomic prediction accuracy in polyploid species: a simulation study
Source: Research Square preprint supplement (doi:10.21203/rs.3.rs-5365958/v1), 2024-11-26
Supplement: Supplementary file 2 [file acace90784142e218eed0af7.xlsx]

## Sheet: Aneuploidy Level
Trait	Model	Tag	meanR	meanMSE	std	lmP	P
Sigmoid100	A	Ex	0.0959333	70.4744	0.106043	0.066	--
Sigmoid100	AD	Ex	0.103267	66.2212	0.101138	0.059	--
Sigmoid100	BayesR	Ex	0.11	83.0898	0.0978288	0.418	--
Sigmoid100	MLP	Ex	0.112735	35.1801	0.0966371	0.093	--
Sigmoid100	CNN	Ex	0.117591	36.6956	0.0976296	0.118	--
Sigmoid100	Attention	Ex	0.111631	35.7822	0.0837792	0.455	--
Norm60	A	A	0.2169	44668.5	0.0779887	0.024	*
Norm60	AD	A	0.233667	45830.6	0.0742616	0	***
Norm60	BayesR	A	0.202267	43253.7	0.0762459	0.009	**
Norm60	MLP	A	0.222075	11468.7	0.0822803	0.011	*
Norm60	CNN	A	0.173452	11327.8	0.0877093	0.822	--
Norm60	Attention	A	0.209509	10539.6	0.0832551	0.001	**
Norm60	A	AD	0.188567	41609.2	0.0654273	0.018	*
Norm60	AD	AD	0.201567	36765.8	0.0896348	0.002	**
Norm60	BayesR	AD	0.180667	37613.5	0.0581783	0.054	--
Norm60	MLP	AD	0.191842	24598.6	0.083984	0.007	**
Norm60	CNN	AD	0.182386	22387.5	0.0903489	0.001	**
Norm60	Attention	AD	0.197449	20139.6	0.0921451	0.001	**
Norm60	A	ADD	0.175067	252742	0.0737554	0.044	*
Norm60	AD	ADD	0.199167	336796	0.0820354	0	***
Norm60	BayesR	ADD	0.1782	314084	0.0630262	0.024	*
Norm60	MLP	ADD	0.219384	78125.1	0.0762792	0	***
Norm60	CNN	ADD	0.195381	73685.2	0.0811903	0.001	**
Norm60	Attention	ADD	0.194054	76307	0.0674609	0	***
Norm30	A	A	0.174233	5051.63	0.0553389	0.059	--
Norm30	AD	A	0.185067	5062.3	0.0705197	0.015	*
Norm30	BayesR	A	0.161233	5091.33	0.0538892	0.079	--
Norm30	MLP	A	0.207782	7858.34	0.0784163	0.003	**
Norm30	CNN	A	0.188546	5422.04	0.0732863	0	***
Norm30	Attention	A	0.176288	5499.34	0.0720407	0.052	--
Norm30	A	AD	0.193333	48533.7	0.0525202	0	***
Norm30	AD	AD	0.211933	34908.6	0.0670373	0.001	**
Norm30	BayesR	AD	0.189433	36733.5	0.0494722	0	***
Norm30	MLP	AD	0.237393	24343.5	0.0691365	0	***
Norm30	CNN	AD	0.215221	21846.4	0.0756049	0	***
Norm30	Attention	AD	0.199431	21103.8	0.0726335	0	***
Norm30	A	ADD	0.152933	86541.3	0.0916466	0.047	*
Norm30	AD	ADD	0.173167	102352	0.101276	0.004	**
Norm30	BayesR	ADD	0.180067	77986.4	0.0829935	0.084	--
Norm30	MLP	ADD	0.201728	49198.4	0.0914377	0.007	**
Norm30	CNN	ADD	0.19656	49987.4	0.091046	0.002	**
Norm30	Attention	ADD	0.194548	47420.3	0.0865491	0	***
Norm100	A	A	0.213933	55764.3	0.0700147	0.075	--
Norm100	AD	A	0.2247	58220.2	0.074747	0.003	**
Norm100	BayesR	A	0.200833	60211.6	0.0788762	0.132	--
Norm100	MLP	A	0.185471	23396.5	0.0807216	0.021	*
Norm100	CNN	A	0.185394	21873	0.0846878	0.058	--
Norm100	Attention	A	0.196555	19840.9	0.0636762	0	***
Norm100	A	AD	0.1805	24005.5	0.0514833	0.346	--
Norm100	AD	AD	0.194533	21534.3	0.0666839	0.024	*
Norm100	BayesR	AD	0.167167	21371.5	0.0532703	0.639	--
Norm100	MLP	AD	0.204642	22890	0.0623161	0.001	**
Norm100	CNN	AD	0.182502	22151.4	0.0708068	0.008	**
Norm100	Attention	AD	0.181589	20592.2	0.062733	0.016	*
Norm100	A	ADD	0.1673	99745.5	0.0598862	0.245	--
Norm100	AD	ADD	0.199267	101498	0.0644103	0.018	*
Norm100	BayesR	ADD	0.160967	103184	0.0577023	0.184	--
Norm100	MLP	ADD	0.185338	109885	0.0739259	0.067	--
Norm100	CNN	ADD	0.178042	107205	0.0788214	0.007	**
Norm100	Attention	ADD	0.189975	96350.5	0.0786907	0.006	**
Norm10	A	A	0.192067	2447.52	0.0643203	0.397	--
Norm10	AD	A	0.2075	2177.76	0.0632498	0.003	**
Norm10	BayesR	A	0.1848	2282.93	0.0684284	0.443	--
Norm10	MLP	A	0.201562	2166.07	0.0556124	0.357	--
Norm10	CNN	A	0.191869	2111.74	0.0733838	0.032	*
Norm10	Attention	A	0.217651	1890.92	0.071806	0	***
Norm10	A	AD	0.2457	31945.6	0.0586781	0.237	--
Norm10	AD	AD	0.2684	24893.6	0.0545752	0.106	--
Norm10	BayesR	AD	0.241533	24283.5	0.0577406	0.214	--
Norm10	MLP	AD	0.262071	21300.2	0.0644584	0.056	--
Norm10	CNN	AD	0.249195	21797.2	0.0513047	0.065	--
Norm10	Attention	AD	0.233371	19133.6	0.0538097	0.098	--
Norm10	A	ADD	0.189133	161319	0.0954776	0.549	--
Norm10	AD	ADD	0.197933	173710	0.118702	0.254	--
Norm10	BayesR	ADD	0.201	165956	0.0705549	0.185	--
Norm10	MLP	ADD	0.222092	32000.3	0.0611081	0	***
Norm10	CNN	ADD	0.193047	30631.6	0.0546345	0.001	**
Norm10	Attention	ADD	0.217018	29758.5	0.0495525	0.047	*
Norm05	A	A	0.212933	1098.99	0.054442	0.848	--
Norm05	AD	A	0.228967	1280.69	0.0681557	0.156	--
Norm05	BayesR	A	0.200767	1424.96	0.0538988	0.715	--
Norm05	MLP	A	0.225436	1151.26	0.0804493	0.028	*
Norm05	CNN	A	0.191847	1066.81	0.0675091	0.018	*
Norm05	Attention	A	0.201774	1034.16	0.0658549	0.017	*
Norm05	A	AD	0.1835	43855.5	0.0649364	0.003	**
Norm05	AD	AD	0.196667	38434.5	0.0709212	0	***
Norm05	BayesR	AD	0.177033	38096.4	0.063622	0.003	**
Norm05	MLP	AD	0.198741	21670.2	0.103171	0.005	**
Norm05	CNN	AD	0.184428	22831	0.107407	0.004	**
Norm05	Attention	AD	0.18037	18208.4	0.0810829	0.001	**
Norm05	A	ADD	0.125467	64926	0.0764541	0.161	--
Norm05	AD	ADD	0.1514	72581.9	0.0781932	0.004	**
Norm05	BayesR	ADD	0.1214	83410.8	0.08321	0.478	--
Norm05	MLP	ADD	0.185973	25816.6	0.0637678	0.022	*
Norm05	CNN	ADD	0.173698	24160	0.0656752	0.127	--
Norm05	Attention	ADD	0.181285	43003.5	0.0813384	0.001	**
Log100	A	Ex	0.140267	9291.16	0.0395648	0.064	--
Log100	AD	Ex	0.173333	9127.6	0.0492876	0.533	--
Log100	BayesR	Ex	0.127733	9389.02	0.0400645	0.056	--
Log100	MLP	Ex	0.131187	3684.3	0.0613601	0.876	--
Log100	CNN	Ex	0.146792	3521.09	0.0726179	0.496	--
Log100	Attention	Ex	0.159137	3036.25	0.0558803	0.959	--
Gamma100	A	Ex	0.0998667	54049.5	0.0625932	0.457	--
Gamma100	BayesR	Ex	0.0948667	44349.7	0.0676001	0.757	--
Gamma100	MLP	Ex	0.157528	23252.4	0.0550613	0.015	*
Gamma100	CNN	Ex	0.155454	21360.6	0.0667595	0.013	*
Gamma100	Attention	Ex	0.160226	18833.8	0.0587479	0.021	*
Gamma100	AD	Ex	0.1467	46891.1	0.0750972	0.008	**
