# Supplementary material for: The impact of genotype transformations and aneuploidy on genomic prediction accuracy in polyploid species: a simulation study
Source: Research Square preprint supplement (doi:10.21203/rs.3.rs-5365958/v1), 2024-11-26
Supplement: Supplementary file 3 [file d481074d0996b7050a6bd715.xlsx]

## Sheet: DL_lmAll
Trait	Model	Copy	Genos	Tag	lr	lmP_lr	P_lr	lmP_Copy	P_Copy	lmP_Geno	P_Geno	Accuracy	Std	MSE
Norm100	Attention	2	Diploid	A	0.001	0.10986	--	1.35844e-06	***	0.000306554	***	0.176359	0.0337232	19895.3
Norm100	Attention	2	Diploid	A	0.01	0.10986	--	1.35844e-06	***	0.000306554	***	0.15656	0.0527294	24239
Norm100	Attention	4	Diploid	A	0.001	0.10986	--	1.35844e-06	***	0.000306554	***	0.13361	0.0719783	19880.4
Norm100	Attention	4	Diploid	A	0.01	0.10986	--	1.35844e-06	***	0.000306554	***	0.09714	0.0632926	26925
Norm100	Attention	6	Diploid	A	0.001	0.10986	--	1.35844e-06	***	0.000306554	***	0.140856	0.0262186	20027.8
Norm100	Attention	6	Diploid	A	0.01	0.10986	--	1.35844e-06	***	0.000306554	***	0.161969	0.104359	21457.4
Norm100	Attention	8	Diploid	A	0.001	0.10986	--	1.35844e-06	***	0.000306554	***	0.209631	0.0287918	19730.6
Norm100	Attention	8	Diploid	A	0.01	0.10986	--	1.35844e-06	***	0.000306554	***	0.145171	0.0586164	22179.3
Norm100	Attention	10	Diploid	A	0.001	0.10986	--	1.35844e-06	***	0.000306554	***	0.256166	0.0360448	19639.1
Norm100	Attention	10	Diploid	A	0.01	0.10986	--	1.35844e-06	***	0.000306554	***	0.252585	0.0560202	21528.1
Norm100	Attention	12	Allele Dosage	A	0.001	0.10986	--	1.35844e-06	***	0.000306554	***	0.353559	0.0405388	18368.5
Norm100	Attention	12	Allele Dosage	A	0.01	0.10986	--	1.35844e-06	***	0.000306554	***	0.32028	0.0600387	23025.9
Norm100	Attention	12	Diploid	A	0.001	0.10986	--	1.35844e-06	***	0.000306554	***	0.262707	0.0282223	19872.3
Norm100	Attention	12	Diploid	A	0.01	0.10986	--	1.35844e-06	***	0.000306554	***	0.234519	0.0813745	19788.2
Norm100	CNN	2	Diploid	A	0.001	0.36422	--	0.00166918	**	0.0013272	**	0.197937	0.0549443	22283.8
Norm100	CNN	2	Diploid	A	0.01	0.36422	--	0.00166918	**	0.0013272	**	0.150847	0.0846367	22075
Norm100	CNN	4	Diploid	A	0.001	0.36422	--	0.00166918	**	0.0013272	**	0.116434	0.0827809	22640
Norm100	CNN	4	Diploid	A	0.01	0.36422	--	0.00166918	**	0.0013272	**	0.126747	0.0552475	23885.3
Norm100	CNN	6	Diploid	A	0.001	0.36422	--	0.00166918	**	0.0013272	**	0.148648	0.0985678	22019.9
Norm100	CNN	6	Diploid	A	0.01	0.36422	--	0.00166918	**	0.0013272	**	0.15198	0.122551	23987.4
Norm100	CNN	8	Diploid	A	0.001	0.36422	--	0.00166918	**	0.0013272	**	0.178423	0.115133	20425.8
Norm100	CNN	8	Diploid	A	0.01	0.36422	--	0.00166918	**	0.0013272	**	0.17174	0.0605042	24009.6
Norm100	CNN	10	Diploid	A	0.001	0.36422	--	0.00166918	**	0.0013272	**	0.223612	0.0658003	20250.3
Norm100	CNN	10	Diploid	A	0.01	0.36422	--	0.00166918	**	0.0013272	**	0.215405	0.046957	20229.2
Norm100	CNN	12	Allele Dosage	A	0.001	0.36422	--	0.00166918	**	0.0013272	**	0.343349	0.0392403	19108.2
Norm100	CNN	12	Allele Dosage	A	0.01	0.36422	--	0.00166918	**	0.0013272	**	0.298757	0.0575849	22076.2
Norm100	CNN	12	Diploid	A	0.001	0.36422	--	0.00166918	**	0.0013272	**	0.247308	0.0178273	23618.3
Norm100	CNN	12	Diploid	A	0.01	0.36422	--	0.00166918	**	0.0013272	**	0.22823	0.0673592	21924.9
Norm100	MLP	2	Diploid	A	0.001	0.0176547	*	0.0194009	*	0.106539	--	0.0477665	0.11902	20602.2
Norm100	MLP	2	Diploid	A	0.01	0.0176547	*	0.0194009	*	0.106539	--	0.166308	0.0597852	22850
Norm100	MLP	4	Diploid	A	0.001	0.0176547	*	0.0194009	*	0.106539	--	0.128375	0.12479	20362.7
Norm100	MLP	4	Diploid	A	0.01	0.0176547	*	0.0194009	*	0.106539	--	0.12636	0.0533354	23994.9
Norm100	MLP	6	Diploid	A	0.001	0.0176547	*	0.0194009	*	0.106539	--	0.16444	0.094658	20386.9
Norm100	MLP	6	Diploid	A	0.01	0.0176547	*	0.0194009	*	0.106539	--	0.172809	0.117204	24057.8
Norm100	MLP	8	Diploid	A	0.001	0.0176547	*	0.0194009	*	0.106539	--	0.139259	0.0621272	19898.7
Norm100	MLP	8	Diploid	A	0.01	0.0176547	*	0.0194009	*	0.106539	--	0.173353	0.0596087	22523.8
Norm100	MLP	10	Diploid	A	0.001	0.0176547	*	0.0194009	*	0.106539	--	0.102849	0.172542	20463.4
Norm100	MLP	10	Diploid	A	0.01	0.0176547	*	0.0194009	*	0.106539	--	0.239123	0.0715768	21547.9
Norm100	MLP	12	Allele Dosage	A	0.001	0.0176547	*	0.0194009	*	0.106539	--	0.220649	0.187961	23176.2
Norm100	MLP	12	Allele Dosage	A	0.01	0.0176547	*	0.0194009	*	0.106539	--	0.329385	0.063906	28512.6
Norm100	MLP	12	Diploid	A	0.001	0.0176547	*	0.0194009	*	0.106539	--	0.203132	0.164678	19576.4
Norm100	MLP	12	Diploid	A	0.01	0.0176547	*	0.0194009	*	0.106539	--	0.234873	0.0809272	25404.9
Norm60	Attention	2	Diploid	A	0.001	0.675852	--	1.4088e-05	***	0.00813673	**	0.148137	0.106294	10750.3
Norm60	Attention	2	Diploid	A	0.01	0.675852	--	1.4088e-05	***	0.00813673	**	0.199293	0.102739	12222.3
Norm60	Attention	4	Diploid	A	0.001	0.675852	--	1.4088e-05	***	0.00813673	**	0.169902	0.0757509	10519.5
Norm60	Attention	4	Diploid	A	0.01	0.675852	--	1.4088e-05	***	0.00813673	**	0.171784	0.0708888	13931.3
Norm60	Attention	6	Diploid	A	0.001	0.675852	--	1.4088e-05	***	0.00813673	**	0.189857	0.0433235	10542.9
Norm60	Attention	6	Diploid	A	0.01	0.675852	--	1.4088e-05	***	0.00813673	**	0.153613	0.0109931	11963.5
Norm60	Attention	8	Diploid	A	0.001	0.675852	--	1.4088e-05	***	0.00813673	**	0.188677	0.0317302	10615.3
Norm60	Attention	8	Diploid	A	0.01	0.675852	--	1.4088e-05	***	0.00813673	**	0.174592	0.0283742	11524.8
Norm60	Attention	10	Diploid	A	0.001	0.675852	--	1.4088e-05	***	0.00813673	**	0.281856	0.0769035	10329.9
Norm60	Attention	10	Diploid	A	0.01	0.675852	--	1.4088e-05	***	0.00813673	**	0.228049	0.0529466	12561.9
Norm60	Attention	12	Allele Dosage	A	0.001	0.675852	--	1.4088e-05	***	0.00813673	**	0.342541	0.0670316	9697
Norm60	Attention	12	Allele Dosage	A	0.01	0.675852	--	1.4088e-05	***	0.00813673	**	0.330725	0.0524833	12041.6
Norm60	Attention	12	Diploid	A	0.001	0.675852	--	1.4088e-05	***	0.00813673	**	0.278624	0.0648862	10479.7
Norm60	Attention	12	Diploid	A	0.01	0.675852	--	1.4088e-05	***	0.00813673	**	0.294717	0.0651385	13038.2
Norm60	CNN	2	Diploid	A	0.001	0.864481	--	0.732003	--	0.015532	*	0.182391	0.103544	10863.4
Norm60	CNN	2	Diploid	A	0.01	0.864481	--	0.732003	--	0.015532	*	0.142051	0.0659709	12807.7
Norm60	CNN	4	Diploid	A	0.001	0.864481	--	0.732003	--	0.015532	*	0.12652	0.0929395	12411.8
Norm60	CNN	4	Diploid	A	0.01	0.864481	--	0.732003	--	0.015532	*	0.18182	0.0555929	11895.9
Norm60	CNN	6	Diploid	A	0.001	0.864481	--	0.732003	--	0.015532	*	0.213486	0.0407446	11463.5
Norm60	CNN	6	Diploid	A	0.01	0.864481	--	0.732003	--	0.015532	*	0.187566	0.0871469	11577.1
Norm60	CNN	8	Diploid	A	0.001	0.864481	--	0.732003	--	0.015532	*	0.154077	0.0776005	11324.6
Norm60	CNN	8	Diploid	A	0.01	0.864481	--	0.732003	--	0.015532	*	0.135685	0.0894073	13657.7
Norm60	CNN	10	Diploid	A	0.001	0.864481	--	0.732003	--	0.015532	*	0.197323	0.0988311	11211.3
Norm60	CNN	10	Diploid	A	0.01	0.864481	--	0.732003	--	0.015532	*	0.215028	0.0638805	11443.2
Norm60	CNN	12	Allele Dosage	A	0.001	0.864481	--	0.732003	--	0.015532	*	0.258512	0.074114	11783.3
Norm60	CNN	12	Allele Dosage	A	0.01	0.864481	--	0.732003	--	0.015532	*	0.263185	0.101011	12499
Norm60	CNN	12	Diploid	A	0.001	0.864481	--	0.732003	--	0.015532	*	0.166914	0.113461	10692
Norm60	CNN	12	Diploid	A	0.01	0.864481	--	0.732003	--	0.015532	*	0.148988	0.141291	12152
Norm60	MLP	2	Diploid	A	0.001	0.000170696	***	0.0205715	*	0.0175397	*	0.114915	0.0805636	11208.7
Norm60	MLP	2	Diploid	A	0.01	0.000170696	***	0.0205715	*	0.0175397	*	0.206032	0.103274	11553.7
Norm60	MLP	4	Diploid	A	0.001	0.000170696	***	0.0205715	*	0.0175397	*	0.105589	0.111416	11482.9
Norm60	MLP	4	Diploid	A	0.01	0.000170696	***	0.0205715	*	0.0175397	*	0.18019	0.080796	12388.7
Norm60	MLP	6	Diploid	A	0.001	0.000170696	***	0.0205715	*	0.0175397	*	0.120407	0.110708	10948.3
Norm60	MLP	6	Diploid	A	0.01	0.000170696	***	0.0205715	*	0.0175397	*	0.182134	0.0497761	11395.8
Norm60	MLP	8	Diploid	A	0.001	0.000170696	***	0.0205715	*	0.0175397	*	0.123726	0.0830831	11111.6
Norm60	MLP	8	Diploid	A	0.01	0.000170696	***	0.0205715	*	0.0175397	*	0.187588	0.0543509	11893.7
Norm60	MLP	10	Diploid	A	0.001	0.000170696	***	0.0205715	*	0.0175397	*	0.0841138	0.0876641	10990.2
Norm60	MLP	10	Diploid	A	0.01	0.000170696	***	0.0205715	*	0.0175397	*	0.280035	0.0623777	10668.5
Norm60	MLP	12	Allele Dosage	A	0.001	0.000170696	***	0.0205715	*	0.0175397	*	0.27461	0.157307	10146.7
Norm60	MLP	12	Allele Dosage	A	0.01	0.000170696	***	0.0205715	*	0.0175397	*	0.341495	0.0748039	14381.8
Norm60	MLP	12	Diploid	A	0.001	0.000170696	***	0.0205715	*	0.0175397	*	0.215013	0.15567	10539.4
Norm60	MLP	12	Diploid	A	0.01	0.000170696	***	0.0205715	*	0.0175397	*	0.296468	0.073853	10911.5
Norm30	Attention	2	Diploid	A	0.001	0.26971	--	0.000141883	***	2.61077e-06	***	0.155519	0.0779857	5057.32
Norm30	Attention	2	Diploid	A	0.01	0.26971	--	0.000141883	***	2.61077e-06	***	0.0947202	0.0390719	6447.05
Norm30	Attention	4	Diploid	A	0.001	0.26971	--	0.000141883	***	2.61077e-06	***	0.14039	0.0697379	5241.02
Norm30	Attention	4	Diploid	A	0.01	0.26971	--	0.000141883	***	2.61077e-06	***	0.10874	0.0645676	6944.42
Norm30	Attention	6	Diploid	A	0.001	0.26971	--	0.000141883	***	2.61077e-06	***	0.183042	0.0713536	5097.35
Norm30	Attention	6	Diploid	A	0.01	0.26971	--	0.000141883	***	2.61077e-06	***	0.194361	0.0330852	5800.91
Norm30	Attention	8	Diploid	A	0.001	0.26971	--	0.000141883	***	2.61077e-06	***	0.148368	0.0835052	5495.21
Norm30	Attention	8	Diploid	A	0.01	0.26971	--	0.000141883	***	2.61077e-06	***	0.153234	0.0565673	5901.39
Norm30	Attention	10	Diploid	A	0.001	0.26971	--	0.000141883	***	2.61077e-06	***	0.199763	0.0618172	6921.92
Norm30	Attention	10	Diploid	A	0.01	0.26971	--	0.000141883	***	2.61077e-06	***	0.249403	0.0439773	5940.4
Norm30	Attention	12	Allele Dosage	A	0.001	0.26971	--	0.000141883	***	2.61077e-06	***	0.358451	0.0525131	4765.89
Norm30	Attention	12	Allele Dosage	A	0.01	0.26971	--	0.000141883	***	2.61077e-06	***	0.322621	0.0521677	5371.44
Norm30	Attention	12	Diploid	A	0.001	0.26971	--	0.000141883	***	2.61077e-06	***	0.230648	0.0568459	5183.23
Norm30	Attention	12	Diploid	A	0.01	0.26971	--	0.000141883	***	2.61077e-06	***	0.178289	0.0491614	5727.48
Norm30	CNN	2	Diploid	A	0.001	0.00969633	**	2.8334e-05	***	2.63396e-06	***	0.150548	0.0423923	5904.69
Norm30	CNN	2	Diploid	A	0.01	0.00969633	**	2.8334e-05	***	2.63396e-06	***	0.152585	0.0233754	5517.82
Norm30	CNN	4	Diploid	A	0.001	0.00969633	**	2.8334e-05	***	2.63396e-06	***	0.0938827	0.0707792	5530.34
Norm30	CNN	4	Diploid	A	0.01	0.00969633	**	2.8334e-05	***	2.63396e-06	***	0.13041	0.0498569	5395.63
Norm30	CNN	6	Diploid	A	0.001	0.00969633	**	2.8334e-05	***	2.63396e-06	***	0.131567	0.0433586	5946.28
Norm30	CNN	6	Diploid	A	0.01	0.00969633	**	2.8334e-05	***	2.63396e-06	***	0.174458	0.0432609	5739.72
Norm30	CNN	8	Diploid	A	0.001	0.00969633	**	2.8334e-05	***	2.63396e-06	***	0.139183	0.0692534	6081.2
Norm30	CNN	8	Diploid	A	0.01	0.00969633	**	2.8334e-05	***	2.63396e-06	***	0.175282	0.0862582	5372.97
Norm30	CNN	10	Diploid	A	0.001	0.00969633	**	2.8334e-05	***	2.63396e-06	***	0.201601	0.0616177	5413.48
Norm30	CNN	10	Diploid	A	0.01	0.00969633	**	2.8334e-05	***	2.63396e-06	***	0.212596	0.0531926	5473.55
Norm30	CNN	12	Allele Dosage	A	0.001	0.00969633	**	2.8334e-05	***	2.63396e-06	***	0.317855	0.108633	4842.12
Norm30	CNN	12	Allele Dosage	A	0.01	0.00969633	**	2.8334e-05	***	2.63396e-06	***	0.37901	0.0437176	5022.61
Norm30	CNN	12	Diploid	A	0.001	0.00969633	**	2.8334e-05	***	2.63396e-06	***	0.198071	0.0515925	5117
Norm30	CNN	12	Diploid	A	0.01	0.00969633	**	2.8334e-05	***	2.63396e-06	***	0.285947	0.0698168	5032.55
Norm30	MLP	2	Diploid	A	0.001	0.0101664	*	0.000146146	***	4.94106e-06	***	0.151457	0.0426446	5264.64
Norm30	MLP	2	Diploid	A	0.01	0.0101664	*	0.000146146	***	4.94106e-06	***	0.185473	0.066145	6018.57
Norm30	MLP	4	Diploid	A	0.001	0.0101664	*	0.000146146	***	4.94106e-06	***	0.1264	0.0631495	5408.06
Norm30	MLP	4	Diploid	A	0.01	0.0101664	*	0.000146146	***	4.94106e-06	***	0.130741	0.0196908	5833.58
Norm30	MLP	6	Diploid	A	0.001	0.0101664	*	0.000146146	***	4.94106e-06	***	0.166441	0.085053	4999.13
Norm30	MLP	6	Diploid	A	0.01	0.0101664	*	0.000146146	***	4.94106e-06	***	0.22046	0.0295629	5995.48
Norm30	MLP	8	Diploid	A	0.001	0.0101664	*	0.000146146	***	4.94106e-06	***	0.153844	0.0498964	5371.65
Norm30	MLP	8	Diploid	A	0.01	0.0101664	*	0.000146146	***	4.94106e-06	***	0.159444	0.0683541	6128.42
Norm30	MLP	10	Diploid	A	0.001	0.0101664	*	0.000146146	***	4.94106e-06	***	0.184526	0.0578003	5093.59
Norm30	MLP	10	Diploid	A	0.01	0.0101664	*	0.000146146	***	4.94106e-06	***	0.274848	0.0770944	5605.55
Norm30	MLP	12	Allele Dosage	A	0.001	0.0101664	*	0.000146146	***	4.94106e-06	***	0.337219	0.0611623	5121.84
Norm30	MLP	12	Allele Dosage	A	0.01	0.0101664	*	0.000146146	***	4.94106e-06	***	0.38692	0.0607826	6067.58
Norm30	MLP	12	Diploid	A	0.001	0.0101664	*	0.000146146	***	4.94106e-06	***	0.228961	0.0797269	5021.69
Norm30	MLP	12	Diploid	A	0.01	0.0101664	*	0.000146146	***	4.94106e-06	***	0.275727	0.0759774	17568.4
Norm10	Attention	2	Diploid	A	0.001	2.376e-08	***	0.0123183	*	5.01309e-06	***	0.162269	0.105257	1810.7
Norm10	Attention	2	Diploid	A	0.01	2.376e-08	***	0.0123183	*	5.01309e-06	***	0.0921191	0.0486981	2482.4
Norm10	Attention	4	Diploid	A	0.001	2.376e-08	***	0.0123183	*	5.01309e-06	***	0.165219	0.0618034	2070.03
Norm10	Attention	4	Diploid	A	0.01	2.376e-08	***	0.0123183	*	5.01309e-06	***	0.142621	0.061432	2162.35
Norm10	Attention	6	Diploid	A	0.001	2.376e-08	***	0.0123183	*	5.01309e-06	***	0.215179	0.0543518	1918.1
Norm10	Attention	6	Diploid	A	0.01	2.376e-08	***	0.0123183	*	5.01309e-06	***	0.13836	0.0762475	2093.69
Norm10	Attention	8	Diploid	A	0.001	2.376e-08	***	0.0123183	*	5.01309e-06	***	0.223879	0.0573225	1855.7
Norm10	Attention	8	Diploid	A	0.01	2.376e-08	***	0.0123183	*	5.01309e-06	***	0.152682	0.0372275	2020.32
Norm10	Attention	10	Diploid	A	0.001	2.376e-08	***	0.0123183	*	5.01309e-06	***	0.261844	0.0340178	1862.5
Norm10	Attention	10	Diploid	A	0.01	2.376e-08	***	0.0123183	*	5.01309e-06	***	0.0884183	0.03492	2169.35
Norm10	Attention	12	Allele Dosage	A	0.001	2.376e-08	***	0.0123183	*	5.01309e-06	***	0.371055	0.058042	2085.43
Norm10	Attention	12	Allele Dosage	A	0.01	2.376e-08	***	0.0123183	*	5.01309e-06	***	0.274911	0.101473	1895.87
Norm10	Attention	12	Diploid	A	0.001	2.376e-08	***	0.0123183	*	5.01309e-06	***	0.277514	0.02896	1828.51
Norm10	Attention	12	Diploid	A	0.01	2.376e-08	***	0.0123183	*	5.01309e-06	***	0.118638	0.0453991	2044.43
Norm10	CNN	2	Diploid	A	0.001	0.0979506	--	0.034291	*	1.24815e-05	***	0.163368	0.100292	2423.34
Norm10	CNN	2	Diploid	A	0.01	0.0979506	--	0.034291	*	1.24815e-05	***	0.142301	0.0465838	2036.2
Norm10	CNN	4	Diploid	A	0.001	0.0979506	--	0.034291	*	1.24815e-05	***	0.138469	0.0663379	2193.17
Norm10	CNN	4	Diploid	A	0.01	0.0979506	--	0.034291	*	1.24815e-05	***	0.160898	0.073152	2221.91
Norm10	CNN	6	Diploid	A	0.001	0.0979506	--	0.034291	*	1.24815e-05	***	0.21541	0.0325659	2133.53
Norm10	CNN	6	Diploid	A	0.01	0.0979506	--	0.034291	*	1.24815e-05	***	0.15876	0.0820422	2169.14
Norm10	CNN	8	Diploid	A	0.001	0.0979506	--	0.034291	*	1.24815e-05	***	0.181002	0.0926972	1917.15
Norm10	CNN	8	Diploid	A	0.01	0.0979506	--	0.034291	*	1.24815e-05	***	0.176345	0.0779844	4258.52
Norm10	CNN	10	Diploid	A	0.001	0.0979506	--	0.034291	*	1.24815e-05	***	0.209169	0.0584629	1964.29
Norm10	CNN	10	Diploid	A	0.01	0.0979506	--	0.034291	*	1.24815e-05	***	0.150064	0.0834133	2173.3
Norm10	CNN	12	Allele Dosage	A	0.001	0.0979506	--	0.034291	*	1.24815e-05	***	0.340472	0.0811371	1959.88
Norm10	CNN	12	Allele Dosage	A	0.01	0.0979506	--	0.034291	*	1.24815e-05	***	0.323643	0.05412	1966.87
Norm10	CNN	12	Diploid	A	0.001	0.0979506	--	0.034291	*	1.24815e-05	***	0.243798	0.0484471	2038.97
Norm10	CNN	12	Diploid	A	0.01	0.0979506	--	0.034291	*	1.24815e-05	***	0.186572	0.0766979	1896.85
Norm10	MLP	2	Diploid	A	0.001	0.249412	--	0.0145532	*	5.52434e-06	***	0.118985	0.107204	2140.05
Norm10	MLP	2	Diploid	A	0.01	0.249412	--	0.0145532	*	5.52434e-06	***	0.192242	0.0607383	2070.16
Norm10	MLP	4	Diploid	A	0.001	0.249412	--	0.0145532	*	5.52434e-06	***	0.102943	0.0788105	1995.11
Norm10	MLP	4	Diploid	A	0.01	0.249412	--	0.0145532	*	5.52434e-06	***	0.177365	0.0489021	1958.3
Norm10	MLP	6	Diploid	A	0.001	0.249412	--	0.0145532	*	5.52434e-06	***	0.219472	0.0464266	1885.86
Norm10	MLP	6	Diploid	A	0.01	0.249412	--	0.0145532	*	5.52434e-06	***	0.21427	0.086628	2326.96
Norm10	MLP	8	Diploid	A	0.001	0.249412	--	0.0145532	*	5.52434e-06	***	0.210958	0.0550122	1907.2
Norm10	MLP	8	Diploid	A	0.01	0.249412	--	0.0145532	*	5.52434e-06	***	0.203451	0.0695374	2212.02
Norm10	MLP	10	Diploid	A	0.001	0.249412	--	0.0145532	*	5.52434e-06	***	0.234861	0.0343982	1859.02
Norm10	MLP	10	Diploid	A	0.01	0.249412	--	0.0145532	*	5.52434e-06	***	0.205315	0.0262131	2246.28
Norm10	MLP	12	Allele Dosage	A	0.001	0.249412	--	0.0145532	*	5.52434e-06	***	0.356752	0.061113	1833.26
Norm10	MLP	12	Allele Dosage	A	0.01	0.249412	--	0.0145532	*	5.52434e-06	***	0.347525	0.0573006	1795.79
Norm10	MLP	12	Diploid	A	0.001	0.249412	--	0.0145532	*	5.52434e-06	***	0.18169	0.096394	1951
Norm10	MLP	12	Diploid	A	0.01	0.249412	--	0.0145532	*	5.52434e-06	***	0.216727	0.0443049	2182.73
Norm05	Attention	2	Diploid	A	0.001	0.269117	--	0.049392	*	0.000309628	***	0.188263	0.0526369	960.738
Norm05	Attention	2	Diploid	A	0.01	0.269117	--	0.049392	*	0.000309628	***	0.208962	0.0383557	1125.21
Norm05	Attention	4	Diploid	A	0.001	0.269117	--	0.049392	*	0.000309628	***	0.168414	0.0360688	1013.3
Norm05	Attention	4	Diploid	A	0.01	0.269117	--	0.049392	*	0.000309628	***	0.133793	0.133242	1157.74
Norm05	Attention	6	Diploid	A	0.001	0.269117	--	0.049392	*	0.000309628	***	0.170012	0.0872568	1101.86
Norm05	Attention	6	Diploid	A	0.01	0.269117	--	0.049392	*	0.000309628	***	0.139618	0.0561931	1208.76
Norm05	Attention	8	Diploid	A	0.001	0.269117	--	0.049392	*	0.000309628	***	0.192154	0.0469602	1013.4
Norm05	Attention	8	Diploid	A	0.01	0.269117	--	0.049392	*	0.000309628	***	0.190708	0.0902024	1077.94
Norm05	Attention	10	Diploid	A	0.001	0.269117	--	0.049392	*	0.000309628	***	0.229541	0.0773636	984.262
Norm05	Attention	10	Diploid	A	0.01	0.269117	--	0.049392	*	0.000309628	***	0.15221	0.103441	1313.57
Norm05	Attention	12	Allele Dosage	A	0.001	0.269117	--	0.049392	*	0.000309628	***	0.327467	0.0468485	923.152
Norm05	Attention	12	Allele Dosage	A	0.01	0.269117	--	0.049392	*	0.000309628	***	0.335877	0.0582941	1091.2
Norm05	Attention	12	Diploid	A	0.001	0.269117	--	0.049392	*	0.000309628	***	0.262258	0.055082	1131.38
Norm05	Attention	12	Diploid	A	0.01	0.269117	--	0.049392	*	0.000309628	***	0.234467	0.113185	1069.16
Norm05	CNN	2	Diploid	A	0.001	0.0601892	--	0.168609	--	0.000559276	***	0.144264	0.0815347	1175.04
Norm05	CNN	2	Diploid	A	0.01	0.0601892	--	0.168609	--	0.000559276	***	0.193855	0.0670649	1132.2
Norm05	CNN	4	Diploid	A	0.001	0.0601892	--	0.168609	--	0.000559276	***	0.196805	0.0381861	1000.61
Norm05	CNN	4	Diploid	A	0.01	0.0601892	--	0.168609	--	0.000559276	***	0.152117	0.0982559	980.64
Norm05	CNN	6	Diploid	A	0.001	0.0601892	--	0.168609	--	0.000559276	***	0.148948	0.0623855	1044.37
Norm05	CNN	6	Diploid	A	0.01	0.0601892	--	0.168609	--	0.000559276	***	0.154821	0.0840085	1075.75
Norm05	CNN	8	Diploid	A	0.001	0.0601892	--	0.168609	--	0.000559276	***	0.206907	0.0340285	1066.95
Norm05	CNN	8	Diploid	A	0.01	0.0601892	--	0.168609	--	0.000559276	***	0.143223	0.0521013	1121.85
Norm05	CNN	10	Diploid	A	0.001	0.0601892	--	0.168609	--	0.000559276	***	0.217415	0.0563034	1056.44
Norm05	CNN	10	Diploid	A	0.01	0.0601892	--	0.168609	--	0.000559276	***	0.0960376	0.113685	1000.43
Norm05	CNN	12	Allele Dosage	A	0.001	0.0601892	--	0.168609	--	0.000559276	***	0.325083	0.0278678	1082.78
Norm05	CNN	12	Allele Dosage	A	0.01	0.0601892	--	0.168609	--	0.000559276	***	0.276211	0.0656822	947.612
Norm05	CNN	12	Diploid	A	0.001	0.0601892	--	0.168609	--	0.000559276	***	0.236745	0.0890727	1057.48
Norm05	CNN	12	Diploid	A	0.01	0.0601892	--	0.168609	--	0.000559276	***	0.222623	0.0796466	957.698
Norm05	MLP	2	Diploid	A	0.001	0.0180645	*	0.000756526	***	6.27878e-05	***	0.162634	0.0825549	1012.15
Norm05	MLP	2	Diploid	A	0.01	0.0180645	*	0.000756526	***	6.27878e-05	***	0.185397	0.0791042	1093.76
Norm05	MLP	4	Diploid	A	0.001	0.0180645	*	0.000756526	***	6.27878e-05	***	0.135992	0.0819921	954.606
Norm05	MLP	4	Diploid	A	0.01	0.0180645	*	0.000756526	***	6.27878e-05	***	0.20835	0.0973256	1166.89
Norm05	MLP	6	Diploid	A	0.001	0.0180645	*	0.000756526	***	6.27878e-05	***	0.173085	0.0765375	1105.49
Norm05	MLP	6	Diploid	A	0.01	0.0180645	*	0.000756526	***	6.27878e-05	***	0.209663	0.0643499	1122.66
Norm05	MLP	8	Diploid	A	0.001	0.0180645	*	0.000756526	***	6.27878e-05	***	0.164057	0.0859909	992.75
Norm05	MLP	8	Diploid	A	0.01	0.0180645	*	0.000756526	***	6.27878e-05	***	0.215746	0.0754038	1092.01
Norm05	MLP	10	Diploid	A	0.001	0.0180645	*	0.000756526	***	6.27878e-05	***	0.225908	0.0739102	947.124
Norm05	MLP	10	Diploid	A	0.01	0.0180645	*	0.000756526	***	6.27878e-05	***	0.23501	0.0987052	1298.77
Norm05	MLP	12	Allele Dosage	A	0.001	0.0180645	*	0.000756526	***	6.27878e-05	***	0.352268	0.0260924	945.987
Norm05	MLP	12	Allele Dosage	A	0.01	0.0180645	*	0.000756526	***	6.27878e-05	***	0.377776	0.032671	1041.02
Norm05	MLP	12	Diploid	A	0.001	0.0180645	*	0.000756526	***	6.27878e-05	***	0.237373	0.0436	1010.52
Norm05	MLP	12	Diploid	A	0.01	0.0180645	*	0.000756526	***	6.27878e-05	***	0.298453	0.045249	1133.46
Mix10030	Attention	2	Diploid	A	0.001	0.8658	--	6.76795e-06	***	0.000472228	***	0.122243	0.0444783	23632.9
Mix10030	Attention	2	Diploid	A	0.01	0.8658	--	6.76795e-06	***	0.000472228	***	0.101438	0.0512789	31489.8
Mix10030	Attention	4	Diploid	A	0.001	0.8658	--	6.76795e-06	***	0.000472228	***	0.128155	0.065458	23763.9
Mix10030	Attention	4	Diploid	A	0.01	0.8658	--	6.76795e-06	***	0.000472228	***	0.121176	0.0544103	28147.5
Mix10030	Attention	6	Diploid	A	0.001	0.8658	--	6.76795e-06	***	0.000472228	***	0.169507	0.0752407	23696.4
Mix10030	Attention	6	Diploid	A	0.01	0.8658	--	6.76795e-06	***	0.000472228	***	0.185862	0.0669757	27143.4
Mix10030	Attention	8	Diploid	A	0.001	0.8658	--	6.76795e-06	***	0.000472228	***	0.166029	0.0698742	23436.7
Mix10030	Attention	8	Diploid	A	0.01	0.8658	--	6.76795e-06	***	0.000472228	***	0.203312	0.0337833	25296.4
Mix10030	Attention	10	Diploid	A	0.001	0.8658	--	6.76795e-06	***	0.000472228	***	0.185793	0.0440956	23566.4
Mix10030	Attention	10	Diploid	A	0.01	0.8658	--	6.76795e-06	***	0.000472228	***	0.213147	0.071304	27511.9
Mix10030	Attention	12	Allele Dosage	A	0.001	0.8658	--	6.76795e-06	***	0.000472228	***	0.314686	0.0443998	23600.4
Mix10030	Attention	12	Allele Dosage	A	0.01	0.8658	--	6.76795e-06	***	0.000472228	***	0.292709	0.0628445	26742
Mix10030	Attention	12	Diploid	A	0.001	0.8658	--	6.76795e-06	***	0.000472228	***	0.221099	0.02451	23309
Mix10030	Attention	12	Diploid	A	0.01	0.8658	--	6.76795e-06	***	0.000472228	***	0.206109	0.0927323	26534.4
Mix10030	CNN	2	Diploid	A	0.001	0.231842	--	0.00903411	**	0.00703113	**	0.112873	0.0463574	29989.1
Mix10030	CNN	2	Diploid	A	0.01	0.231842	--	0.00903411	**	0.00703113	**	0.104283	0.0418041	28001.6
Mix10030	CNN	4	Diploid	A	0.001	0.231842	--	0.00903411	**	0.00703113	**	0.129357	0.0281708	28659.7
Mix10030	CNN	4	Diploid	A	0.01	0.231842	--	0.00903411	**	0.00703113	**	0.148761	0.0457368	25584.7
Mix10030	CNN	6	Diploid	A	0.001	0.231842	--	0.00903411	**	0.00703113	**	0.189483	0.0808792	24982
Mix10030	CNN	6	Diploid	A	0.01	0.231842	--	0.00903411	**	0.00703113	**	0.26693	0.0968743	23713.9
Mix10030	CNN	8	Diploid	A	0.001	0.231842	--	0.00903411	**	0.00703113	**	0.120473	0.0677547	26475.8
Mix10030	CNN	8	Diploid	A	0.01	0.231842	--	0.00903411	**	0.00703113	**	0.182949	0.0521316	27071.4
Mix10030	CNN	10	Diploid	A	0.001	0.231842	--	0.00903411	**	0.00703113	**	0.159609	0.108796	25121.5
Mix10030	CNN	10	Diploid	A	0.01	0.231842	--	0.00903411	**	0.00703113	**	0.204899	0.0819752	26934.3
Mix10030	CNN	12	Allele Dosage	A	0.001	0.231842	--	0.00903411	**	0.00703113	**	0.301278	0.111111	25451.1
Mix10030	CNN	12	Allele Dosage	A	0.01	0.231842	--	0.00903411	**	0.00703113	**	0.287525	0.0875819	26315.8
Mix10030	CNN	12	Diploid	A	0.001	0.231842	--	0.00903411	**	0.00703113	**	0.221435	0.0294381	24437.3
Mix10030	CNN	12	Diploid	A	0.01	0.231842	--	0.00903411	**	0.00703113	**	0.196915	0.104544	25710.6
Mix10030	MLP	2	Diploid	A	0.001	4.85773e-05	***	0.00019071	***	0.19673	--	-0.022659	0.13286	25056.9
Mix10030	MLP	2	Diploid	A	0.01	4.85773e-05	***	0.00019071	***	0.19673	--	0.0891667	0.042847	30436.7
Mix10030	MLP	4	Diploid	A	0.001	4.85773e-05	***	0.00019071	***	0.19673	--	-0.00488715	0.134884	24272.4
Mix10030	MLP	4	Diploid	A	0.01	4.85773e-05	***	0.00019071	***	0.19673	--	0.145799	0.0526738	28402.1
Mix10030	MLP	6	Diploid	A	0.001	4.85773e-05	***	0.00019071	***	0.19673	--	0.0534908	0.0978734	23862.1
Mix10030	MLP	6	Diploid	A	0.01	4.85773e-05	***	0.00019071	***	0.19673	--	0.222708	0.0987134	26277.4
Mix10030	MLP	8	Diploid	A	0.001	4.85773e-05	***	0.00019071	***	0.19673	--	0.198863	0.0639965	25090.9
Mix10030	MLP	8	Diploid	A	0.01	4.85773e-05	***	0.00019071	***	0.19673	--	0.196944	0.054711	30194.4
Mix10030	MLP	10	Diploid	A	0.001	4.85773e-05	***	0.00019071	***	0.19673	--	0.114718	0.0976171	24353.1
Mix10030	MLP	10	Diploid	A	0.01	4.85773e-05	***	0.00019071	***	0.19673	--	0.205342	0.0832054	34846.3
Mix10030	MLP	12	Allele Dosage	A	0.001	4.85773e-05	***	0.00019071	***	0.19673	--	0.198128	0.17379	24049.1
Mix10030	MLP	12	Allele Dosage	A	0.01	4.85773e-05	***	0.00019071	***	0.19673	--	0.324838	0.0837161	30075.4
Mix10030	MLP	12	Diploid	A	0.001	4.85773e-05	***	0.00019071	***	0.19673	--	0.130265	0.17099	24726.8
Mix10030	MLP	12	Diploid	A	0.01	4.85773e-05	***	0.00019071	***	0.19673	--	0.24002	0.0762182	24810.1
Mix10010	Attention	2	Diploid	A	0.001	0.45398	--	0.000874226	***	0.0010259	**	0.0925245	0.083085	19588
Mix10010	Attention	2	Diploid	A	0.01	0.45398	--	0.000874226	***	0.0010259	**	0.108516	0.0726542	26891.7
Mix10010	Attention	4	Diploid	A	0.001	0.45398	--	0.000874226	***	0.0010259	**	0.108574	0.0941853	19654.6
Mix10010	Attention	4	Diploid	A	0.01	0.45398	--	0.000874226	***	0.0010259	**	0.105832	0.0823324	26154.9
Mix10010	Attention	6	Diploid	A	0.001	0.45398	--	0.000874226	***	0.0010259	**	0.216052	0.0794717	19226.1
Mix10010	Attention	6	Diploid	A	0.01	0.45398	--	0.000874226	***	0.0010259	**	0.230648	0.0448082	21317.9
Mix10010	Attention	8	Diploid	A	0.001	0.45398	--	0.000874226	***	0.0010259	**	0.192215	0.102216	19213.6
Mix10010	Attention	8	Diploid	A	0.01	0.45398	--	0.000874226	***	0.0010259	**	0.175822	0.0450169	22834.7
Mix10010	Attention	10	Diploid	A	0.001	0.45398	--	0.000874226	***	0.0010259	**	0.165876	0.0522383	19648.6
Mix10010	Attention	10	Diploid	A	0.01	0.45398	--	0.000874226	***	0.0010259	**	0.162351	0.0375823	21262.2
Mix10010	Attention	12	Allele Dosage	A	0.001	0.45398	--	0.000874226	***	0.0010259	**	0.333199	0.0583637	19021.5
Mix10010	Attention	12	Allele Dosage	A	0.01	0.45398	--	0.000874226	***	0.0010259	**	0.284872	0.037155	19300.8
Mix10010	Attention	12	Diploid	A	0.001	0.45398	--	0.000874226	***	0.0010259	**	0.232947	0.0641873	19423.9
Mix10010	Attention	12	Diploid	A	0.01	0.45398	--	0.000874226	***	0.0010259	**	0.182247	0.0699999	22909.7
Mix10010	CNN	2	Diploid	A	0.001	0.353676	--	0.0488413	*	0.000996549	***	0.133588	0.0701476	24095.5
Mix10010	CNN	2	Diploid	A	0.01	0.353676	--	0.0488413	*	0.000996549	***	0.101599	0.0271804	21852.8
Mix10010	CNN	4	Diploid	A	0.001	0.353676	--	0.0488413	*	0.000996549	***	0.0998211	0.075772	24594.2
Mix10010	CNN	4	Diploid	A	0.01	0.353676	--	0.0488413	*	0.000996549	***	0.0979938	0.0686077	23129.4
Mix10010	CNN	6	Diploid	A	0.001	0.353676	--	0.0488413	*	0.000996549	***	0.193914	0.0883713	21954.6
Mix10010	CNN	6	Diploid	A	0.01	0.353676	--	0.0488413	*	0.000996549	***	0.148382	0.0454309	25364.3
Mix10010	CNN	8	Diploid	A	0.001	0.353676	--	0.0488413	*	0.000996549	***	0.151655	0.0731815	20807
Mix10010	CNN	8	Diploid	A	0.01	0.353676	--	0.0488413	*	0.000996549	***	0.144145	0.0577832	21650.7
Mix10010	CNN	10	Diploid	A	0.001	0.353676	--	0.0488413	*	0.000996549	***	0.0951459	0.079364	21709.8
Mix10010	CNN	10	Diploid	A	0.01	0.353676	--	0.0488413	*	0.000996549	***	0.129546	0.0255626	26522.2
Mix10010	CNN	12	Allele Dosage	A	0.001	0.353676	--	0.0488413	*	0.000996549	***	0.286584	0.0670367	20172.3
Mix10010	CNN	12	Allele Dosage	A	0.01	0.353676	--	0.0488413	*	0.000996549	***	0.231017	0.0995631	19669.1
Mix10010	CNN	12	Diploid	A	0.001	0.353676	--	0.0488413	*	0.000996549	***	0.187959	0.0850328	23107.7
Mix10010	CNN	12	Diploid	A	0.01	0.353676	--	0.0488413	*	0.000996549	***	0.187639	0.039875	21923.3
Mix10010	MLP	2	Diploid	A	0.001	0.0143395	*	0.000403664	***	0.0667639	--	-0.0329253	0.0669916	20690.4
Mix10010	MLP	2	Diploid	A	0.01	0.0143395	*	0.000403664	***	0.0667639	--	0.093296	0.0691027	23569.3
Mix10010	MLP	4	Diploid	A	0.001	0.0143395	*	0.000403664	***	0.0667639	--	0.0681071	0.105612	20728.2
Mix10010	MLP	4	Diploid	A	0.01	0.0143395	*	0.000403664	***	0.0667639	--	0.10751	0.0640285	26894
Mix10010	MLP	6	Diploid	A	0.001	0.0143395	*	0.000403664	***	0.0667639	--	0.206288	0.147612	19398.9
Mix10010	MLP	6	Diploid	A	0.01	0.0143395	*	0.000403664	***	0.0667639	--	0.229881	0.0478849	22026.5
Mix10010	MLP	8	Diploid	A	0.001	0.0143395	*	0.000403664	***	0.0667639	--	0.144127	0.143995	20176.3
Mix10010	MLP	8	Diploid	A	0.01	0.0143395	*	0.000403664	***	0.0667639	--	0.1901	0.0483758	23559.7
Mix10010	MLP	10	Diploid	A	0.001	0.0143395	*	0.000403664	***	0.0667639	--	0.122046	0.100834	19379.1
Mix10010	MLP	10	Diploid	A	0.01	0.0143395	*	0.000403664	***	0.0667639	--	0.174415	0.0405166	21914.4
Mix10010	MLP	12	Allele Dosage	A	0.001	0.0143395	*	0.000403664	***	0.0667639	--	0.252998	0.156098	19361
Mix10010	MLP	12	Allele Dosage	A	0.01	0.0143395	*	0.000403664	***	0.0667639	--	0.317516	0.0407836	22247
Mix10010	MLP	12	Diploid	A	0.001	0.0143395	*	0.000403664	***	0.0667639	--	0.166971	0.145271	20268.2
Mix10010	MLP	12	Diploid	A	0.01	0.0143395	*	0.000403664	***	0.0667639	--	0.235575	0.0368294	23414.9
Mix3010	Attention	2	Diploid	A	0.001	0.000706073	***	0.501474	--	9.27728e-05	***	0.154938	0.0870803	6879.62
Mix3010	Attention	2	Diploid	A	0.01	0.000706073	***	0.501474	--	9.27728e-05	***	0.168083	0.0731958	8332.92
Mix3010	Attention	4	Diploid	A	0.001	0.000706073	***	0.501474	--	9.27728e-05	***	0.147952	0.0624949	7332.55
Mix3010	Attention	4	Diploid	A	0.01	0.000706073	***	0.501474	--	9.27728e-05	***	0.115688	0.0468169	8125.84
Mix3010	Attention	6	Diploid	A	0.001	0.000706073	***	0.501474	--	9.27728e-05	***	0.165755	0.0610011	6855.27
Mix3010	Attention	6	Diploid	A	0.01	0.000706073	***	0.501474	--	9.27728e-05	***	0.0509322	0.0369632	8594.1
Mix3010	Attention	8	Diploid	A	0.001	0.000706073	***	0.501474	--	9.27728e-05	***	0.131883	0.0415326	7354.3
Mix3010	Attention	8	Diploid	A	0.01	0.000706073	***	0.501474	--	9.27728e-05	***	0.0722785	0.0359215	8006.89
Mix3010	Attention	10	Diploid	A	0.001	0.000706073	***	0.501474	--	9.27728e-05	***	0.186342	0.090421	7070.04
Mix3010	Attention	10	Diploid	A	0.01	0.000706073	***	0.501474	--	9.27728e-05	***	0.144627	0.107439	7696.08
Mix3010	Attention	12	Allele Dosage	A	0.001	0.000706073	***	0.501474	--	9.27728e-05	***	0.299377	0.0682306	6639.42
Mix3010	Attention	12	Allele Dosage	A	0.01	0.000706073	***	0.501474	--	9.27728e-05	***	0.231276	0.0568618	7490.88
Mix3010	Attention	12	Diploid	A	0.001	0.000706073	***	0.501474	--	9.27728e-05	***	0.229858	0.0879262	7329.46
Mix3010	Attention	12	Diploid	A	0.01	0.000706073	***	0.501474	--	9.27728e-05	***	0.106582	0.0593707	7547.94
Mix3010	CNN	2	Diploid	A	0.001	0.0134435	*	0.74098	--	1.21927e-08	***	0.1387	0.0466061	7762.14
Mix3010	CNN	2	Diploid	A	0.01	0.0134435	*	0.74098	--	1.21927e-08	***	0.169362	0.0563927	7681.53
Mix3010	CNN	4	Diploid	A	0.001	0.0134435	*	0.74098	--	1.21927e-08	***	0.128656	0.0622018	7357.44
Mix3010	CNN	4	Diploid	A	0.01	0.0134435	*	0.74098	--	1.21927e-08	***	0.102918	0.0494701	38280
Mix3010	CNN	6	Diploid	A	0.001	0.0134435	*	0.74098	--	1.21927e-08	***	0.180402	0.0748725	8165.39
Mix3010	CNN	6	Diploid	A	0.01	0.0134435	*	0.74098	--	1.21927e-08	***	0.103853	0.0552671	6913.04
Mix3010	CNN	8	Diploid	A	0.001	0.0134435	*	0.74098	--	1.21927e-08	***	0.113826	0.0508562	7632.38
Mix3010	CNN	8	Diploid	A	0.01	0.0134435	*	0.74098	--	1.21927e-08	***	0.057241	0.0311138	8139.73
Mix3010	CNN	10	Diploid	A	0.001	0.0134435	*	0.74098	--	1.21927e-08	***	0.128571	0.0619036	7511.22
Mix3010	CNN	10	Diploid	A	0.01	0.0134435	*	0.74098	--	1.21927e-08	***	0.0870447	0.0350732	6790.11
Mix3010	CNN	12	Allele Dosage	A	0.001	0.0134435	*	0.74098	--	1.21927e-08	***	0.287997	0.0761146	7458.43
Mix3010	CNN	12	Allele Dosage	A	0.01	0.0134435	*	0.74098	--	1.21927e-08	***	0.264419	0.0252522	7417.01
Mix3010	CNN	12	Diploid	A	0.001	0.0134435	*	0.74098	--	1.21927e-08	***	0.190567	0.0884223	6733.62
Mix3010	CNN	12	Diploid	A	0.01	0.0134435	*	0.74098	--	1.21927e-08	***	0.128609	0.0341228	6926.24
Mix3010	MLP	2	Diploid	A	0.001	0.915524	--	0.116133	--	0.000751517	***	0.145686	0.108852	6710.46
Mix3010	MLP	2	Diploid	A	0.01	0.915524	--	0.116133	--	0.000751517	***	0.164268	0.0397589	7651.99
Mix3010	MLP	4	Diploid	A	0.001	0.915524	--	0.116133	--	0.000751517	***	0.141212	0.0858101	7468.27
Mix3010	MLP	4	Diploid	A	0.01	0.915524	--	0.116133	--	0.000751517	***	0.109281	0.0797886	8568.37
Mix3010	MLP	6	Diploid	A	0.001	0.915524	--	0.116133	--	0.000751517	***	0.137755	0.0717611	6996.35
Mix3010	MLP	6	Diploid	A	0.01	0.915524	--	0.116133	--	0.000751517	***	0.147031	0.0459076	7319.19
Mix3010	MLP	8	Diploid	A	0.001	0.915524	--	0.116133	--	0.000751517	***	0.118247	0.0374941	6998.6
Mix3010	MLP	8	Diploid	A	0.01	0.915524	--	0.116133	--	0.000751517	***	0.0971751	0.0526339	8225.13
Mix3010	MLP	10	Diploid	A	0.001	0.915524	--	0.116133	--	0.000751517	***	0.13387	0.102214	6894.88
Mix3010	MLP	10	Diploid	A	0.01	0.915524	--	0.116133	--	0.000751517	***	0.157405	0.053423	7591.96
Mix3010	MLP	12	Allele Dosage	A	0.001	0.915524	--	0.116133	--	0.000751517	***	0.259373	0.067762	7602.34
Mix3010	MLP	12	Allele Dosage	A	0.01	0.915524	--	0.116133	--	0.000751517	***	0.273041	0.0444971	7168.82
Mix3010	MLP	12	Diploid	A	0.001	0.915524	--	0.116133	--	0.000751517	***	0.221492	0.0759992	7141.3
Mix3010	MLP	12	Diploid	A	0.01	0.915524	--	0.116133	--	0.000751517	***	0.196851	0.0653257	6744.88
Norm100	Attention	2	Diploid	AD	0.001	0.31187	--	0.00394072	**	0.568282	--	0.188242	0.0444093	20489.1
Norm100	Attention	2	Diploid	AD	0.01	0.31187	--	0.00394072	**	0.568282	--	0.144187	0.0741666	23944.6
Norm100	Attention	4	Diploid	AD	0.001	0.31187	--	0.00394072	**	0.568282	--	0.140344	0.0485504	20706.1
Norm100	Attention	4	Diploid	AD	0.01	0.31187	--	0.00394072	**	0.568282	--	0.12779	0.030777	24029.8
Norm100	Attention	6	Diploid	AD	0.001	0.31187	--	0.00394072	**	0.568282	--	0.114021	0.0433429	21326.5
Norm100	Attention	6	Diploid	AD	0.01	0.31187	--	0.00394072	**	0.568282	--	0.149294	0.0226464	23931.4
Norm100	Attention	8	Diploid	AD	0.001	0.31187	--	0.00394072	**	0.568282	--	0.176648	0.0654816	20954.6
Norm100	Attention	8	Diploid	AD	0.01	0.31187	--	0.00394072	**	0.568282	--	0.195467	0.0546539	21164.8
Norm100	Attention	10	Diploid	AD	0.001	0.31187	--	0.00394072	**	0.568282	--	0.250585	0.0276377	19847.6
Norm100	Attention	10	Diploid	AD	0.01	0.31187	--	0.00394072	**	0.568282	--	0.2591	0.0357307	21041.2
Norm100	Attention	12	Allele Dosage	AD	0.001	0.31187	--	0.00394072	**	0.568282	--	0.244258	0.0551878	21104.4
Norm100	Attention	12	Allele Dosage	AD	0.01	0.31187	--	0.00394072	**	0.568282	--	0.206382	0.0465792	22673.1
Norm100	Attention	12	Diploid	AD	0.001	0.31187	--	0.00394072	**	0.568282	--	0.219692	0.0398492	20229.6
Norm100	Attention	12	Diploid	AD	0.01	0.31187	--	0.00394072	**	0.568282	--	0.144531	0.115404	22816.3
Norm100	CNN	2	Diploid	AD	0.001	0.635118	--	0.000587828	***	0.594646	--	0.178797	0.0467557	24504.6
Norm100	CNN	2	Diploid	AD	0.01	0.635118	--	0.000587828	***	0.594646	--	0.159039	0.100196	25590.7
Norm100	CNN	4	Diploid	AD	0.001	0.635118	--	0.000587828	***	0.594646	--	0.126138	0.0482153	23930.5
Norm100	CNN	4	Diploid	AD	0.01	0.635118	--	0.000587828	***	0.594646	--	0.131387	0.0431527	23106.8
Norm100	CNN	6	Diploid	AD	0.001	0.635118	--	0.000587828	***	0.594646	--	0.113531	0.0582949	25789.4
Norm100	CNN	6	Diploid	AD	0.01	0.635118	--	0.000587828	***	0.594646	--	0.160537	0.0544095	20738.8
Norm100	CNN	8	Diploid	AD	0.001	0.635118	--	0.000587828	***	0.594646	--	0.185164	0.0597874	22402.3
Norm100	CNN	8	Diploid	AD	0.01	0.635118	--	0.000587828	***	0.594646	--	0.181109	0.0625178	21728.9
Norm100	CNN	10	Diploid	AD	0.001	0.635118	--	0.000587828	***	0.594646	--	0.205514	0.0353183	21242
Norm100	CNN	10	Diploid	AD	0.01	0.635118	--	0.000587828	***	0.594646	--	0.232347	0.0627779	20829.6
Norm100	CNN	12	Allele Dosage	AD	0.001	0.635118	--	0.000587828	***	0.594646	--	0.243654	0.0831759	20189.3
Norm100	CNN	12	Allele Dosage	AD	0.01	0.635118	--	0.000587828	***	0.594646	--	0.215715	0.0508376	23680
Norm100	CNN	12	Diploid	AD	0.001	0.635118	--	0.000587828	***	0.594646	--	0.210041	0.0372821	20474.9
Norm100	CNN	12	Diploid	AD	0.01	0.635118	--	0.000587828	***	0.594646	--	0.230593	0.0555073	20913.6
Norm100	MLP	2	Diploid	AD	0.001	3.90116e-05	***	0.0001486	***	0.803479	--	0.131293	0.0388795	20582.7
Norm100	MLP	2	Diploid	AD	0.01	3.90116e-05	***	0.0001486	***	0.803479	--	0.164445	0.065388	24959.4
Norm100	MLP	4	Diploid	AD	0.001	3.90116e-05	***	0.0001486	***	0.803479	--	0.12727	0.0845345	21541.3
Norm100	MLP	4	Diploid	AD	0.01	3.90116e-05	***	0.0001486	***	0.803479	--	0.163425	0.0308509	23649.5
Norm100	MLP	6	Diploid	AD	0.001	3.90116e-05	***	0.0001486	***	0.803479	--	0.120163	0.0515391	21393.4
Norm100	MLP	6	Diploid	AD	0.01	3.90116e-05	***	0.0001486	***	0.803479	--	0.187837	0.0417076	24561.9
Norm100	MLP	8	Diploid	AD	0.001	3.90116e-05	***	0.0001486	***	0.803479	--	0.154448	0.0599673	21527.6
Norm100	MLP	8	Diploid	AD	0.01	3.90116e-05	***	0.0001486	***	0.803479	--	0.198686	0.0450435	21116.1
Norm100	MLP	10	Diploid	AD	0.001	3.90116e-05	***	0.0001486	***	0.803479	--	0.200756	0.0504355	21277.3
Norm100	MLP	10	Diploid	AD	0.01	3.90116e-05	***	0.0001486	***	0.803479	--	0.264138	0.0565407	21314.9
Norm100	MLP	12	Allele Dosage	AD	0.001	3.90116e-05	***	0.0001486	***	0.803479	--	0.166492	0.0978852	20589.7
Norm100	MLP	12	Allele Dosage	AD	0.01	3.90116e-05	***	0.0001486	***	0.803479	--	0.264639	0.0513296	23024.3
Norm100	MLP	12	Diploid	AD	0.001	3.90116e-05	***	0.0001486	***	0.803479	--	0.174182	0.0291866	21229.9
Norm100	MLP	12	Diploid	AD	0.01	3.90116e-05	***	0.0001486	***	0.803479	--	0.249322	0.0670859	21738
Norm60	Attention	2	Diploid	AD	0.001	0.00492728	**	0.00155409	**	0.051443	--	0.122302	0.0676684	20604.7
Norm60	Attention	2	Diploid	AD	0.01	0.00492728	**	0.00155409	**	0.051443	--	0.0883733	0.0701239	27775.9
Norm60	Attention	4	Diploid	AD	0.001	0.00492728	**	0.00155409	**	0.051443	--	0.154612	0.0509435	20303.1
Norm60	Attention	4	Diploid	AD	0.01	0.00492728	**	0.00155409	**	0.051443	--	0.167945	0.0691458	22435.3
Norm60	Attention	6	Diploid	AD	0.001	0.00492728	**	0.00155409	**	0.051443	--	0.195887	0.0851021	20587.3
Norm60	Attention	6	Diploid	AD	0.01	0.00492728	**	0.00155409	**	0.051443	--	0.138979	0.0724112	22160.2
Norm60	Attention	8	Diploid	AD	0.001	0.00492728	**	0.00155409	**	0.051443	--	0.166762	0.0799136	20347.2
Norm60	Attention	8	Diploid	AD	0.01	0.00492728	**	0.00155409	**	0.051443	--	0.146736	0.0573864	21889.1
Norm60	Attention	10	Diploid	AD	0.001	0.00492728	**	0.00155409	**	0.051443	--	0.273036	0.0755963	19327
Norm60	Attention	10	Diploid	AD	0.01	0.00492728	**	0.00155409	**	0.051443	--	0.190092	0.0855802	21525.1
Norm60	Attention	12	Allele Dosage	AD	0.001	0.00492728	**	0.00155409	**	0.051443	--	0.326263	0.0935329	21119.2
Norm60	Attention	12	Allele Dosage	AD	0.01	0.00492728	**	0.00155409	**	0.051443	--	0.243212	0.105229	20624.7
Norm60	Attention	12	Diploid	AD	0.001	0.00492728	**	0.00155409	**	0.051443	--	0.272095	0.101983	19668.3
Norm60	Attention	12	Diploid	AD	0.01	0.00492728	**	0.00155409	**	0.051443	--	0.141412	0.10631	21076.6
Norm60	CNN	2	Diploid	AD	0.001	0.478547	--	2.2854e-08	***	0.619763	--	0.130193	0.0253906	25940.6
Norm60	CNN	2	Diploid	AD	0.01	0.478547	--	2.2854e-08	***	0.619763	--	0.0792413	0.0717153	25081.9
Norm60	CNN	4	Diploid	AD	0.001	0.478547	--	2.2854e-08	***	0.619763	--	0.124402	0.0610275	23372.9
Norm60	CNN	4	Diploid	AD	0.01	0.478547	--	2.2854e-08	***	0.619763	--	0.124475	0.0621685	23224
Norm60	CNN	6	Diploid	AD	0.001	0.478547	--	2.2854e-08	***	0.619763	--	0.159858	0.0698621	21823.8
Norm60	CNN	6	Diploid	AD	0.01	0.478547	--	2.2854e-08	***	0.619763	--	0.180123	0.0635845	23526.1
Norm60	CNN	8	Diploid	AD	0.001	0.478547	--	2.2854e-08	***	0.619763	--	0.154007	0.0775018	21862.5
Norm60	CNN	8	Diploid	AD	0.01	0.478547	--	2.2854e-08	***	0.619763	--	0.146832	0.0460128	29845.1
Norm60	CNN	10	Diploid	AD	0.001	0.478547	--	2.2854e-08	***	0.619763	--	0.276929	0.100191	20356.7
Norm60	CNN	10	Diploid	AD	0.01	0.478547	--	2.2854e-08	***	0.619763	--	0.247174	0.0682567	21633
Norm60	CNN	12	Allele Dosage	AD	0.001	0.478547	--	2.2854e-08	***	0.619763	--	0.28745	0.0523889	19564
Norm60	CNN	12	Allele Dosage	AD	0.01	0.478547	--	2.2854e-08	***	0.619763	--	0.259275	0.0587667	20993.7
Norm60	CNN	12	Diploid	AD	0.001	0.478547	--	2.2854e-08	***	0.619763	--	0.248924	0.0890536	20968.7
Norm60	CNN	12	Diploid	AD	0.01	0.478547	--	2.2854e-08	***	0.619763	--	0.263032	0.084887	20789.6
Norm60	MLP	2	Diploid	AD	0.001	0.00556349	**	0.00184455	**	0.0124005	*	0.115499	0.0484764	21175.1
Norm60	MLP	2	Diploid	AD	0.01	0.00556349	**	0.00184455	**	0.0124005	*	0.129332	0.0777278	24970.8
Norm60	MLP	4	Diploid	AD	0.001	0.00556349	**	0.00184455	**	0.0124005	*	0.0767773	0.0837203	21502.6
Norm60	MLP	4	Diploid	AD	0.01	0.00556349	**	0.00184455	**	0.0124005	*	0.161132	0.0751281	23062.2
Norm60	MLP	6	Diploid	AD	0.001	0.00556349	**	0.00184455	**	0.0124005	*	0.109553	0.125386	20232.8
Norm60	MLP	6	Diploid	AD	0.01	0.00556349	**	0.00184455	**	0.0124005	*	0.208098	0.0638125	22665.6
Norm60	MLP	8	Diploid	AD	0.001	0.00556349	**	0.00184455	**	0.0124005	*	0.0946776	0.0691212	21354.9
Norm60	MLP	8	Diploid	AD	0.01	0.00556349	**	0.00184455	**	0.0124005	*	0.161867	0.0715158	27719.4
Norm60	MLP	10	Diploid	AD	0.001	0.00556349	**	0.00184455	**	0.0124005	*	0.164655	0.111501	19662.1
Norm60	MLP	10	Diploid	AD	0.01	0.00556349	**	0.00184455	**	0.0124005	*	0.228398	0.0956553	25193.1
Norm60	MLP	12	Allele Dosage	AD	0.001	0.00556349	**	0.00184455	**	0.0124005	*	0.288016	0.117406	20741.7
Norm60	MLP	12	Allele Dosage	AD	0.01	0.00556349	**	0.00184455	**	0.0124005	*	0.308805	0.0729782	37393.8
Norm60	MLP	12	Diploid	AD	0.001	0.00556349	**	0.00184455	**	0.0124005	*	0.197545	0.123827	20630.2
Norm60	MLP	12	Diploid	AD	0.01	0.00556349	**	0.00184455	**	0.0124005	*	0.262222	0.0757316	23980.5
Norm30	Attention	2	Diploid	AD	0.001	0.634365	--	5.68808e-08	***	0.148979	--	0.126712	0.0717027	19661.2
Norm30	Attention	2	Diploid	AD	0.01	0.634365	--	5.68808e-08	***	0.148979	--	0.15908	0.0448799	23114.6
Norm30	Attention	4	Diploid	AD	0.001	0.634365	--	5.68808e-08	***	0.148979	--	0.135698	0.0540991	19829.8
Norm30	Attention	4	Diploid	AD	0.01	0.634365	--	5.68808e-08	***	0.148979	--	0.131361	0.0544409	23965.5
Norm30	Attention	6	Diploid	AD	0.001	0.634365	--	5.68808e-08	***	0.148979	--	0.198333	0.0193334	19520.3
Norm30	Attention	6	Diploid	AD	0.01	0.634365	--	5.68808e-08	***	0.148979	--	0.187727	0.0788032	20900.8
Norm30	Attention	8	Diploid	AD	0.001	0.634365	--	5.68808e-08	***	0.148979	--	0.177134	0.0574384	20019.1
Norm30	Attention	8	Diploid	AD	0.01	0.634365	--	5.68808e-08	***	0.148979	--	0.20606	0.0387104	20041.9
Norm30	Attention	10	Diploid	AD	0.001	0.634365	--	5.68808e-08	***	0.148979	--	0.231297	0.0645777	20592.2
Norm30	Attention	10	Diploid	AD	0.01	0.634365	--	5.68808e-08	***	0.148979	--	0.250785	0.0732168	19174.7
Norm30	Attention	12	Allele Dosage	AD	0.001	0.634365	--	5.68808e-08	***	0.148979	--	0.302308	0.0631768	20284.3
Norm30	Attention	12	Allele Dosage	AD	0.01	0.634365	--	5.68808e-08	***	0.148979	--	0.278892	0.0386485	19879.5
Norm30	Attention	12	Diploid	AD	0.001	0.634365	--	5.68808e-08	***	0.148979	--	0.259155	0.0633484	19640.8
Norm30	Attention	12	Diploid	AD	0.01	0.634365	--	5.68808e-08	***	0.148979	--	0.261574	0.0634363	19425.6
Norm30	CNN	2	Diploid	AD	0.001	0.053069	--	1.83122e-06	***	0.364129	--	0.144177	0.0672378	23181.7
Norm30	CNN	2	Diploid	AD	0.01	0.053069	--	1.83122e-06	***	0.364129	--	0.139051	0.0808317	21977.3
Norm30	CNN	4	Diploid	AD	0.001	0.053069	--	1.83122e-06	***	0.364129	--	0.112607	0.0566453	21790.9
Norm30	CNN	4	Diploid	AD	0.01	0.053069	--	1.83122e-06	***	0.364129	--	0.150519	0.0821355	24472.8
Norm30	CNN	6	Diploid	AD	0.001	0.053069	--	1.83122e-06	***	0.364129	--	0.222306	0.0321212	20843.1
Norm30	CNN	6	Diploid	AD	0.01	0.053069	--	1.83122e-06	***	0.364129	--	0.226379	0.0349035	20158.9
Norm30	CNN	8	Diploid	AD	0.001	0.053069	--	1.83122e-06	***	0.364129	--	0.18362	0.0702529	20599.2
Norm30	CNN	8	Diploid	AD	0.01	0.053069	--	1.83122e-06	***	0.364129	--	0.247629	0.0512686	20464.9
Norm30	CNN	10	Diploid	AD	0.001	0.053069	--	1.83122e-06	***	0.364129	--	0.194088	0.0992265	19430.1
Norm30	CNN	10	Diploid	AD	0.01	0.053069	--	1.83122e-06	***	0.364129	--	0.243778	0.0237412	21818.6
Norm30	CNN	12	Allele Dosage	AD	0.001	0.053069	--	1.83122e-06	***	0.364129	--	0.274956	0.0848534	19598
Norm30	CNN	12	Allele Dosage	AD	0.01	0.053069	--	1.83122e-06	***	0.364129	--	0.293021	0.0347249	23206.7
Norm30	CNN	12	Diploid	AD	0.001	0.053069	--	1.83122e-06	***	0.364129	--	0.245725	0.0586488	24843.3
Norm30	CNN	12	Diploid	AD	0.01	0.053069	--	1.83122e-06	***	0.364129	--	0.283971	0.0535722	22186
Norm30	MLP	2	Diploid	AD	0.001	2.05429e-12	***	1.20709e-06	***	0.440282	--	0.0441135	0.0450463	21844.6
Norm30	MLP	2	Diploid	AD	0.01	2.05429e-12	***	1.20709e-06	***	0.440282	--	0.174619	0.0488186	25507.2
Norm30	MLP	4	Diploid	AD	0.001	2.05429e-12	***	1.20709e-06	***	0.440282	--	0.0995066	0.0427966	21583.7
Norm30	MLP	4	Diploid	AD	0.01	2.05429e-12	***	1.20709e-06	***	0.440282	--	0.197026	0.0663765	23006.7
Norm30	MLP	6	Diploid	AD	0.001	2.05429e-12	***	1.20709e-06	***	0.440282	--	0.157261	0.0441684	20220.9
Norm30	MLP	6	Diploid	AD	0.01	2.05429e-12	***	1.20709e-06	***	0.440282	--	0.234121	0.0834611	25913.9
Norm30	MLP	8	Diploid	AD	0.001	2.05429e-12	***	1.20709e-06	***	0.440282	--	0.126237	0.0847253	20551.2
Norm30	MLP	8	Diploid	AD	0.01	2.05429e-12	***	1.20709e-06	***	0.440282	--	0.241325	0.0349802	22415.8
Norm30	MLP	10	Diploid	AD	0.001	2.05429e-12	***	1.20709e-06	***	0.440282	--	0.123262	0.0356815	20628.2
Norm30	MLP	10	Diploid	AD	0.01	2.05429e-12	***	1.20709e-06	***	0.440282	--	0.272591	0.0504258	28359.6
Norm30	MLP	12	Allele Dosage	AD	0.001	2.05429e-12	***	1.20709e-06	***	0.440282	--	0.184999	0.0716246	20213.4
Norm30	MLP	12	Allele Dosage	AD	0.01	2.05429e-12	***	1.20709e-06	***	0.440282	--	0.326085	0.0499391	20185.9
Norm30	MLP	12	Diploid	AD	0.001	2.05429e-12	***	1.20709e-06	***	0.440282	--	0.184799	0.0817552	19529.4
Norm30	MLP	12	Diploid	AD	0.01	2.05429e-12	***	1.20709e-06	***	0.440282	--	0.304674	0.0541329	20858
Norm10	Attention	2	Diploid	AD	0.001	0.0518705	--	0.477	--	0.000165207	***	0.224958	0.0428228	19168.6
Norm10	Attention	2	Diploid	AD	0.01	0.0518705	--	0.477	--	0.000165207	***	0.204763	0.0996817	22006.7
Norm10	Attention	4	Diploid	AD	0.001	0.0518705	--	0.477	--	0.000165207	***	0.226759	0.0768327	19167.8
Norm10	Attention	4	Diploid	AD	0.01	0.0518705	--	0.477	--	0.000165207	***	0.192306	0.044863	21405.6
Norm10	Attention	6	Diploid	AD	0.001	0.0518705	--	0.477	--	0.000165207	***	0.199949	0.0436919	19250
Norm10	Attention	6	Diploid	AD	0.01	0.0518705	--	0.477	--	0.000165207	***	0.197043	0.076654	19888.7
Norm10	Attention	8	Diploid	AD	0.001	0.0518705	--	0.477	--	0.000165207	***	0.221111	0.0685618	19138.9
Norm10	Attention	8	Diploid	AD	0.01	0.0518705	--	0.477	--	0.000165207	***	0.206519	0.0755974	21192.7
Norm10	Attention	10	Diploid	AD	0.001	0.0518705	--	0.477	--	0.000165207	***	0.259775	0.0409719	18885
Norm10	Attention	10	Diploid	AD	0.01	0.0518705	--	0.477	--	0.000165207	***	0.218705	0.120699	19514.7
Norm10	Attention	12	Allele Dosage	AD	0.001	0.0518705	--	0.477	--	0.000165207	***	0.351653	0.0548284	18426.9
Norm10	Attention	12	Allele Dosage	AD	0.01	0.0518705	--	0.477	--	0.000165207	***	0.322207	0.119257	18281.4
Norm10	Attention	12	Diploid	AD	0.001	0.0518705	--	0.477	--	0.000165207	***	0.267675	0.0299503	19191.1
Norm10	Attention	12	Diploid	AD	0.01	0.0518705	--	0.477	--	0.000165207	***	0.174212	0.081754	20117.3
Norm10	CNN	2	Diploid	AD	0.001	0.757333	--	0.0611084	--	3.78568e-05	***	0.235195	0.0570211	21015
Norm10	CNN	2	Diploid	AD	0.01	0.757333	--	0.0611084	--	3.78568e-05	***	0.220864	0.0427733	21435.4
Norm10	CNN	4	Diploid	AD	0.001	0.757333	--	0.0611084	--	3.78568e-05	***	0.250193	0.0879539	19683.6
Norm10	CNN	4	Diploid	AD	0.01	0.757333	--	0.0611084	--	3.78568e-05	***	0.248921	0.0524491	21496.5
Norm10	CNN	6	Diploid	AD	0.001	0.757333	--	0.0611084	--	3.78568e-05	***	0.258532	0.0651388	19813.5
Norm10	CNN	6	Diploid	AD	0.01	0.757333	--	0.0611084	--	3.78568e-05	***	0.242078	0.0577414	23021.9
Norm10	CNN	8	Diploid	AD	0.001	0.757333	--	0.0611084	--	3.78568e-05	***	0.184686	0.0401389	22879.2
Norm10	CNN	8	Diploid	AD	0.01	0.757333	--	0.0611084	--	3.78568e-05	***	0.236104	0.0670149	22320
Norm10	CNN	10	Diploid	AD	0.001	0.757333	--	0.0611084	--	3.78568e-05	***	0.224251	0.0723589	21095.2
Norm10	CNN	10	Diploid	AD	0.01	0.757333	--	0.0611084	--	3.78568e-05	***	0.262943	0.0451881	21026.1
Norm10	CNN	12	Allele Dosage	AD	0.001	0.757333	--	0.0611084	--	3.78568e-05	***	0.368031	0.0379646	18319.4
Norm10	CNN	12	Allele Dosage	AD	0.01	0.757333	--	0.0611084	--	3.78568e-05	***	0.368431	0.0624367	19893.5
Norm10	CNN	12	Diploid	AD	0.001	0.757333	--	0.0611084	--	3.78568e-05	***	0.312449	0.0385291	19881.5
Norm10	CNN	12	Diploid	AD	0.01	0.757333	--	0.0611084	--	3.78568e-05	***	0.284258	0.0397725	21483
Norm10	MLP	2	Diploid	AD	0.001	4.21191e-07	***	0.100619	--	9.50031e-05	***	0.175732	0.1269	19633
Norm10	MLP	2	Diploid	AD	0.01	4.21191e-07	***	0.100619	--	9.50031e-05	***	0.244225	0.0449394	22194.4
Norm10	MLP	4	Diploid	AD	0.001	4.21191e-07	***	0.100619	--	9.50031e-05	***	0.149544	0.066428	20846.1
Norm10	MLP	4	Diploid	AD	0.01	4.21191e-07	***	0.100619	--	9.50031e-05	***	0.243632	0.0561096	21649.6
Norm10	MLP	6	Diploid	AD	0.001	4.21191e-07	***	0.100619	--	9.50031e-05	***	0.0989751	0.0592455	19788.5
Norm10	MLP	6	Diploid	AD	0.01	4.21191e-07	***	0.100619	--	9.50031e-05	***	0.24922	0.0594157	22768.7
Norm10	MLP	8	Diploid	AD	0.001	4.21191e-07	***	0.100619	--	9.50031e-05	***	0.178203	0.0773172	20494.4
Norm10	MLP	8	Diploid	AD	0.01	4.21191e-07	***	0.100619	--	9.50031e-05	***	0.236829	0.07119	21332.4
Norm10	MLP	10	Diploid	AD	0.001	4.21191e-07	***	0.100619	--	9.50031e-05	***	0.193696	0.0773679	19803
Norm10	MLP	10	Diploid	AD	0.01	4.21191e-07	***	0.100619	--	9.50031e-05	***	0.285032	0.067945	20134.3
Norm10	MLP	12	Allele Dosage	AD	0.001	4.21191e-07	***	0.100619	--	9.50031e-05	***	0.321645	0.0479364	19366.3
Norm10	MLP	12	Allele Dosage	AD	0.01	4.21191e-07	***	0.100619	--	9.50031e-05	***	0.37395	0.0734657	21377
Norm10	MLP	12	Diploid	AD	0.001	4.21191e-07	***	0.100619	--	9.50031e-05	***	0.166008	0.0579912	19953.4
Norm10	MLP	12	Diploid	AD	0.01	4.21191e-07	***	0.100619	--	9.50031e-05	***	0.313491	0.077138	19722.1
Norm05	Attention	2	Diploid	AD	0.001	0.249806	--	0.00287619	**	0.129389	--	0.103218	0.0469411	18244.9
Norm05	Attention	2	Diploid	AD	0.01	0.249806	--	0.00287619	**	0.129389	--	0.110491	0.0452366	22929.1
Norm05	Attention	4	Diploid	AD	0.001	0.249806	--	0.00287619	**	0.129389	--	0.110735	0.0924868	18456.4
Norm05	Attention	4	Diploid	AD	0.01	0.249806	--	0.00287619	**	0.129389	--	0.138796	0.0920226	20091.7
Norm05	Attention	6	Diploid	AD	0.001	0.249806	--	0.00287619	**	0.129389	--	0.21533	0.0567678	18205.2
Norm05	Attention	6	Diploid	AD	0.01	0.249806	--	0.00287619	**	0.129389	--	0.198973	0.0823211	20351.2
Norm05	Attention	8	Diploid	AD	0.001	0.249806	--	0.00287619	**	0.129389	--	0.207604	0.0593638	18088.2
Norm05	Attention	8	Diploid	AD	0.01	0.249806	--	0.00287619	**	0.129389	--	0.200871	0.0659823	18849.9
Norm05	Attention	10	Diploid	AD	0.001	0.249806	--	0.00287619	**	0.129389	--	0.200358	0.0722379	18285.3
Norm05	Attention	10	Diploid	AD	0.01	0.249806	--	0.00287619	**	0.129389	--	0.182671	0.118748	19742.5
Norm05	Attention	12	Allele Dosage	AD	0.001	0.249806	--	0.00287619	**	0.129389	--	0.289618	0.0572647	20386.5
Norm05	Attention	12	Allele Dosage	AD	0.01	0.249806	--	0.00287619	**	0.129389	--	0.240098	0.126706	18811.4
Norm05	Attention	12	Diploid	AD	0.001	0.249806	--	0.00287619	**	0.129389	--	0.244974	0.0571781	17970.2
Norm05	Attention	12	Diploid	AD	0.01	0.249806	--	0.00287619	**	0.129389	--	0.147278	0.070628	19797.6
Norm05	CNN	2	Diploid	AD	0.001	0.820208	--	6.44644e-05	***	0.4349	--	0.12879	0.0361406	24385.9
Norm05	CNN	2	Diploid	AD	0.01	0.820208	--	6.44644e-05	***	0.4349	--	0.0789824	0.0996581	26882.1
Norm05	CNN	4	Diploid	AD	0.001	0.820208	--	6.44644e-05	***	0.4349	--	0.0881535	0.0850989	19655.8
Norm05	CNN	4	Diploid	AD	0.01	0.820208	--	6.44644e-05	***	0.4349	--	0.115654	0.0790681	20324.3
Norm05	CNN	6	Diploid	AD	0.001	0.820208	--	6.44644e-05	***	0.4349	--	0.181817	0.0688384	18769
Norm05	CNN	6	Diploid	AD	0.01	0.820208	--	6.44644e-05	***	0.4349	--	0.233839	0.124567	21022.3
Norm05	CNN	8	Diploid	AD	0.001	0.820208	--	6.44644e-05	***	0.4349	--	0.217102	0.0571176	19100.5
Norm05	CNN	8	Diploid	AD	0.01	0.820208	--	6.44644e-05	***	0.4349	--	0.23313	0.0772981	27210.1
Norm05	CNN	10	Diploid	AD	0.001	0.820208	--	6.44644e-05	***	0.4349	--	0.165384	0.0915947	18106.9
Norm05	CNN	10	Diploid	AD	0.01	0.820208	--	6.44644e-05	***	0.4349	--	0.191073	0.088261	21471.7
Norm05	CNN	12	Allele Dosage	AD	0.001	0.820208	--	6.44644e-05	***	0.4349	--	0.249085	0.0474267	18543.6
Norm05	CNN	12	Allele Dosage	AD	0.01	0.820208	--	6.44644e-05	***	0.4349	--	0.187572	0.109629	83709.3
Norm05	CNN	12	Diploid	AD	0.001	0.820208	--	6.44644e-05	***	0.4349	--	0.231973	0.0455305	18523.8
Norm05	CNN	12	Diploid	AD	0.01	0.820208	--	6.44644e-05	***	0.4349	--	0.253891	0.0791106	20075.5
Norm05	MLP	2	Diploid	AD	0.001	0.00343802	**	0.000694136	***	0.851181	--	0.0846494	0.0663554	19435.8
Norm05	MLP	2	Diploid	AD	0.01	0.00343802	**	0.000694136	***	0.851181	--	0.103358	0.0699345	22504.9
Norm05	MLP	4	Diploid	AD	0.001	0.00343802	**	0.000694136	***	0.851181	--	0.126443	0.0677324	19721.5
Norm05	MLP	4	Diploid	AD	0.01	0.00343802	**	0.000694136	***	0.851181	--	0.138244	0.090516	21209.7
Norm05	MLP	6	Diploid	AD	0.001	0.00343802	**	0.000694136	***	0.851181	--	0.13418	0.107517	18315.5
Norm05	MLP	6	Diploid	AD	0.01	0.00343802	**	0.000694136	***	0.851181	--	0.241768	0.0985326	23609.4
Norm05	MLP	8	Diploid	AD	0.001	0.00343802	**	0.000694136	***	0.851181	--	0.189264	0.0691133	18879.1
Norm05	MLP	8	Diploid	AD	0.01	0.00343802	**	0.000694136	***	0.851181	--	0.227369	0.0906401	22303.4
Norm05	MLP	10	Diploid	AD	0.001	0.00343802	**	0.000694136	***	0.851181	--	0.175587	0.10322	19699.2
Norm05	MLP	10	Diploid	AD	0.01	0.00343802	**	0.000694136	***	0.851181	--	0.212719	0.103375	21349.5
Norm05	MLP	12	Allele Dosage	AD	0.001	0.00343802	**	0.000694136	***	0.851181	--	0.164732	0.0725931	18117.6
Norm05	MLP	12	Allele Dosage	AD	0.01	0.00343802	**	0.000694136	***	0.851181	--	0.316207	0.0906388	19593
Norm05	MLP	12	Diploid	AD	0.001	0.00343802	**	0.000694136	***	0.851181	--	0.176162	0.133192	18709.6
Norm05	MLP	12	Diploid	AD	0.01	0.00343802	**	0.000694136	***	0.851181	--	0.26899	0.098883	19044.6
Norm100	Attention	2	Diploid	ADD	0.001	0.00197051	**	0.0228409	*	0.152659	--	0.165686	0.0549101	94767.8
Norm100	Attention	2	Diploid	ADD	0.01	0.00197051	**	0.0228409	*	0.152659	--	0.170768	0.0648609	124016
Norm100	Attention	4	Diploid	ADD	0.001	0.00197051	**	0.0228409	*	0.152659	--	0.150382	0.0703827	97828.5
Norm100	Attention	4	Diploid	ADD	0.01	0.00197051	**	0.0228409	*	0.152659	--	0.0813832	0.0692146	116717
Norm100	Attention	6	Diploid	ADD	0.001	0.00197051	**	0.0228409	*	0.152659	--	0.15617	0.0717964	96432.9
Norm100	Attention	6	Diploid	ADD	0.01	0.00197051	**	0.0228409	*	0.152659	--	0.107699	0.0538416	110957
Norm100	Attention	8	Diploid	ADD	0.001	0.00197051	**	0.0228409	*	0.152659	--	0.159206	0.101497	98347.6
Norm100	Attention	8	Diploid	ADD	0.01	0.00197051	**	0.0228409	*	0.152659	--	0.121178	0.0417636	119490
Norm100	Attention	10	Diploid	ADD	0.001	0.00197051	**	0.0228409	*	0.152659	--	0.241939	0.0530392	97089.6
Norm100	Attention	10	Diploid	ADD	0.01	0.00197051	**	0.0228409	*	0.152659	--	0.154116	0.032342	116439
Norm100	Attention	12	Allele Dosage	ADD	0.001	0.00197051	**	0.0228409	*	0.152659	--	0.240771	0.0539907	97953.3
Norm100	Attention	12	Allele Dosage	ADD	0.01	0.00197051	**	0.0228409	*	0.152659	--	0.221119	0.0737829	107257
Norm100	Attention	12	Diploid	ADD	0.001	0.00197051	**	0.0228409	*	0.152659	--	0.266469	0.0515448	93636.7
Norm100	Attention	12	Diploid	ADD	0.01	0.00197051	**	0.0228409	*	0.152659	--	0.142657	0.11804	108581
Norm100	CNN	2	Diploid	ADD	0.001	0.164296	--	0.000139103	***	0.179727	--	0.143468	0.050606	109915
Norm100	CNN	2	Diploid	ADD	0.01	0.164296	--	0.000139103	***	0.179727	--	0.149228	0.0655468	113766
Norm100	CNN	4	Diploid	ADD	0.001	0.164296	--	0.000139103	***	0.179727	--	0.134147	0.0573287	104269
Norm100	CNN	4	Diploid	ADD	0.01	0.164296	--	0.000139103	***	0.179727	--	0.120731	0.094736	113553
Norm100	CNN	6	Diploid	ADD	0.001	0.164296	--	0.000139103	***	0.179727	--	0.142893	0.0454105	120983
Norm100	CNN	6	Diploid	ADD	0.01	0.164296	--	0.000139103	***	0.179727	--	0.161342	0.0689401	102384
Norm100	CNN	8	Diploid	ADD	0.001	0.164296	--	0.000139103	***	0.179727	--	0.129951	0.0587211	108885
Norm100	CNN	8	Diploid	ADD	0.01	0.164296	--	0.000139103	***	0.179727	--	0.172795	0.090771	105657
Norm100	CNN	10	Diploid	ADD	0.001	0.164296	--	0.000139103	***	0.179727	--	0.18143	0.0600377	96809.4
Norm100	CNN	10	Diploid	ADD	0.01	0.164296	--	0.000139103	***	0.179727	--	0.229542	0.0669072	103603
Norm100	CNN	12	Allele Dosage	ADD	0.001	0.164296	--	0.000139103	***	0.179727	--	0.229959	0.0363497	96991.7
Norm100	CNN	12	Allele Dosage	ADD	0.01	0.164296	--	0.000139103	***	0.179727	--	0.268062	0.0758768	99591.4
Norm100	CNN	12	Diploid	ADD	0.001	0.164296	--	0.000139103	***	0.179727	--	0.229137	0.0447806	93926.4
Norm100	CNN	12	Diploid	ADD	0.01	0.164296	--	0.000139103	***	0.179727	--	0.234613	0.038218	104267
Norm100	MLP	2	Diploid	ADD	0.001	0.00053482	***	0.0161065	*	0.239782	--	0.100963	0.0370123	104120
Norm100	MLP	2	Diploid	ADD	0.01	0.00053482	***	0.0161065	*	0.239782	--	0.179713	0.0636536	109922
Norm100	MLP	4	Diploid	ADD	0.001	0.00053482	***	0.0161065	*	0.239782	--	0.103241	0.0632275	99597.4
Norm100	MLP	4	Diploid	ADD	0.01	0.00053482	***	0.0161065	*	0.239782	--	0.160239	0.0690516	112885
Norm100	MLP	6	Diploid	ADD	0.001	0.00053482	***	0.0161065	*	0.239782	--	0.091187	0.106567	97151.1
Norm100	MLP	6	Diploid	ADD	0.01	0.00053482	***	0.0161065	*	0.239782	--	0.154098	0.0602374	105869
Norm100	MLP	8	Diploid	ADD	0.001	0.00053482	***	0.0161065	*	0.239782	--	0.0770334	0.0775818	95752
Norm100	MLP	8	Diploid	ADD	0.01	0.00053482	***	0.0161065	*	0.239782	--	0.163029	0.0638442	116098
Norm100	MLP	10	Diploid	ADD	0.001	0.00053482	***	0.0161065	*	0.239782	--	0.183334	0.103626	94283.6
Norm100	MLP	10	Diploid	ADD	0.01	0.00053482	***	0.0161065	*	0.239782	--	0.199866	0.102234	104487
Norm100	MLP	12	Allele Dosage	ADD	0.001	0.00053482	***	0.0161065	*	0.239782	--	0.186164	0.0752875	96375.5
Norm100	MLP	12	Allele Dosage	ADD	0.01	0.00053482	***	0.0161065	*	0.239782	--	0.26313	0.097612	98922.9
Norm100	MLP	12	Diploid	ADD	0.001	0.00053482	***	0.0161065	*	0.239782	--	0.158494	0.100415	96774.3
Norm100	MLP	12	Diploid	ADD	0.01	0.00053482	***	0.0161065	*	0.239782	--	0.255086	0.0602611	110047
Norm60	Attention	2	Diploid	ADD	0.001	1.72463e-19	***	0.207314	--	0.899678	--	0.0811188	0.039744	281343
Norm60	Attention	2	Diploid	ADD	0.01	1.72463e-19	***	0.207314	--	0.899678	--	0.130521	0.0333327	86291.8
Norm60	Attention	4	Diploid	ADD	0.001	1.72463e-19	***	0.207314	--	0.899678	--	-0.0508416	0.0572266	284815
Norm60	Attention	4	Diploid	ADD	0.01	1.72463e-19	***	0.207314	--	0.899678	--	0.15066	0.0104135	76503.6
Norm60	Attention	6	Diploid	ADD	0.001	1.72463e-19	***	0.207314	--	0.899678	--	0.0105117	0.0991851	285503
Norm60	Attention	6	Diploid	ADD	0.01	1.72463e-19	***	0.207314	--	0.899678	--	0.178709	0.0521377	75778.5
Norm60	Attention	8	Diploid	ADD	0.001	1.72463e-19	***	0.207314	--	0.899678	--	-0.0172658	0.0432278	285649
Norm60	Attention	8	Diploid	ADD	0.01	1.72463e-19	***	0.207314	--	0.899678	--	0.160485	0.0420208	75703.3
Norm60	Attention	10	Diploid	ADD	0.001	1.72463e-19	***	0.207314	--	0.899678	--	-0.0746208	0.0505115	286129
Norm60	Attention	10	Diploid	ADD	0.01	1.72463e-19	***	0.207314	--	0.899678	--	0.270348	0.0318182	77347.6
Norm60	Attention	12	Allele Dosage	ADD	0.001	1.72463e-19	***	0.207314	--	0.899678	--	-0.0258761	0.0532927	287327
Norm60	Attention	12	Allele Dosage	ADD	0.01	1.72463e-19	***	0.207314	--	0.899678	--	0.249785	0.0615414	73498.3
Norm60	Attention	12	Diploid	ADD	0.001	1.72463e-19	***	0.207314	--	0.899678	--	-0.0152582	0.0662086	283965
Norm60	Attention	12	Diploid	ADD	0.01	1.72463e-19	***	0.207314	--	0.899678	--	0.273602	0.0446136	66217.3
Norm60	CNN	2	Diploid	ADD	0.001	1.62399e-05	***	0.00150093	**	0.563808	--	0.141496	0.0259839	343032
Norm60	CNN	2	Diploid	ADD	0.01	1.62399e-05	***	0.00150093	**	0.563808	--	0.0958104	0.0641646	89162.5
Norm60	CNN	4	Diploid	ADD	0.001	1.62399e-05	***	0.00150093	**	0.563808	--	0.0470013	0.0744666	321801
Norm60	CNN	4	Diploid	ADD	0.01	1.62399e-05	***	0.00150093	**	0.563808	--	0.175328	0.0583528	75400
Norm60	CNN	6	Diploid	ADD	0.001	1.62399e-05	***	0.00150093	**	0.563808	--	0.0767362	0.108237	340944
Norm60	CNN	6	Diploid	ADD	0.01	1.62399e-05	***	0.00150093	**	0.563808	--	0.221532	0.0590127	67875
Norm60	CNN	8	Diploid	ADD	0.001	1.62399e-05	***	0.00150093	**	0.563808	--	0.0414497	0.0557514	301985
Norm60	CNN	8	Diploid	ADD	0.01	1.62399e-05	***	0.00150093	**	0.563808	--	0.183943	0.0590291	76933.1
Norm60	CNN	10	Diploid	ADD	0.001	1.62399e-05	***	0.00150093	**	0.563808	--	0.10789	0.101659	286354
Norm60	CNN	10	Diploid	ADD	0.01	1.62399e-05	***	0.00150093	**	0.563808	--	0.244972	0.0849527	66364.9
Norm60	CNN	12	Allele Dosage	ADD	0.001	1.62399e-05	***	0.00150093	**	0.563808	--	0.168113	0.11328	300899
Norm60	CNN	12	Allele Dosage	ADD	0.01	1.62399e-05	***	0.00150093	**	0.563808	--	0.274302	0.0642079	83909.9
Norm60	CNN	12	Diploid	ADD	0.001	1.62399e-05	***	0.00150093	**	0.563808	--	0.215049	0.101619	275280
Norm60	CNN	12	Diploid	ADD	0.01	1.62399e-05	***	0.00150093	**	0.563808	--	0.2507	0.0726067	66375.9
Norm60	MLP	2	Diploid	ADD	0.001	6.41864e-11	***	0.000192544	***	0.941155	--	0.0144643	0.147287	304140
Norm60	MLP	2	Diploid	ADD	0.01	6.41864e-11	***	0.000192544	***	0.941155	--	0.125439	0.0526683	77516.8
Norm60	MLP	4	Diploid	ADD	0.001	6.41864e-11	***	0.000192544	***	0.941155	--	-0.0126908	0.121418	304024
Norm60	MLP	4	Diploid	ADD	0.01	6.41864e-11	***	0.000192544	***	0.941155	--	0.179033	0.0353267	74604.2
Norm60	MLP	6	Diploid	ADD	0.001	6.41864e-11	***	0.000192544	***	0.941155	--	0.0199176	0.122097	285898
Norm60	MLP	6	Diploid	ADD	0.01	6.41864e-11	***	0.000192544	***	0.941155	--	0.221898	0.0742754	96749.3
Norm60	MLP	8	Diploid	ADD	0.001	6.41864e-11	***	0.000192544	***	0.941155	--	0.0191664	0.102571	285474
Norm60	MLP	8	Diploid	ADD	0.01	6.41864e-11	***	0.000192544	***	0.941155	--	0.218943	0.0468849	76625
Norm60	MLP	10	Diploid	ADD	0.001	6.41864e-11	***	0.000192544	***	0.941155	--	0.159868	0.142401	273607
Norm60	MLP	10	Diploid	ADD	0.01	6.41864e-11	***	0.000192544	***	0.941155	--	0.258839	0.0429309	74083.2
Norm60	MLP	12	Allele Dosage	ADD	0.001	6.41864e-11	***	0.000192544	***	0.941155	--	0.0911281	0.13243	283676
Norm60	MLP	12	Allele Dosage	ADD	0.01	6.41864e-11	***	0.000192544	***	0.941155	--	0.32653	0.0205833	75830.9
Norm60	MLP	12	Diploid	ADD	0.001	6.41864e-11	***	0.000192544	***	0.941155	--	0.0837354	0.15277	282805
Norm60	MLP	12	Diploid	ADD	0.01	6.41864e-11	***	0.000192544	***	0.941155	--	0.312153	0.053153	69171.9
Norm30	Attention	2	Diploid	ADD	0.001	0.0200909	*	7.49784e-09	***	0.83434	--	0.0822327	0.095327	174032
Norm30	Attention	2	Diploid	ADD	0.01	0.0200909	*	7.49784e-09	***	0.83434	--	0.142316	0.0306142	57325.1
Norm30	Attention	4	Diploid	ADD	0.001	0.0200909	*	7.49784e-09	***	0.83434	--	0.0925316	0.025585	175864
Norm30	Attention	4	Diploid	ADD	0.01	0.0200909	*	7.49784e-09	***	0.83434	--	0.102136	0.0949579	52499.2
Norm30	Attention	6	Diploid	ADD	0.001	0.0200909	*	7.49784e-09	***	0.83434	--	0.170175	0.0427505	182159
Norm30	Attention	6	Diploid	ADD	0.01	0.0200909	*	7.49784e-09	***	0.83434	--	0.219605	0.0513305	43834.2
Norm30	Attention	8	Diploid	ADD	0.001	0.0200909	*	7.49784e-09	***	0.83434	--	0.14521	0.0345415	177391
Norm30	Attention	8	Diploid	ADD	0.01	0.0200909	*	7.49784e-09	***	0.83434	--	0.177281	0.053799	47917.9
Norm30	Attention	10	Diploid	ADD	0.001	0.0200909	*	7.49784e-09	***	0.83434	--	0.248513	0.0526379	170679
Norm30	Attention	10	Diploid	ADD	0.01	0.0200909	*	7.49784e-09	***	0.83434	--	0.253808	0.0748756	39757
Norm30	Attention	12	Allele Dosage	ADD	0.001	0.0200909	*	7.49784e-09	***	0.83434	--	0.2275	0.0652299	199061
Norm30	Attention	12	Allele Dosage	ADD	0.01	0.0200909	*	7.49784e-09	***	0.83434	--	0.275552	0.069602	40904
Norm30	Attention	12	Diploid	ADD	0.001	0.0200909	*	7.49784e-09	***	0.83434	--	0.224592	0.046276	168588
Norm30	Attention	12	Diploid	ADD	0.01	0.0200909	*	7.49784e-09	***	0.83434	--	0.27214	0.0778463	43188.1
Norm30	CNN	2	Diploid	ADD	0.001	5.2452e-05	***	1.19333e-06	***	0.948004	--	0.078082	0.0790483	211925
Norm30	CNN	2	Diploid	ADD	0.01	5.2452e-05	***	1.19333e-06	***	0.948004	--	0.140914	0.0648242	55555.7
Norm30	CNN	4	Diploid	ADD	0.001	5.2452e-05	***	1.19333e-06	***	0.948004	--	0.0807976	0.0332129	207895
Norm30	CNN	4	Diploid	ADD	0.01	5.2452e-05	***	1.19333e-06	***	0.948004	--	0.124204	0.073591	52752.5
Norm30	CNN	6	Diploid	ADD	0.001	5.2452e-05	***	1.19333e-06	***	0.948004	--	0.153594	0.0516453	198057
Norm30	CNN	6	Diploid	ADD	0.01	5.2452e-05	***	1.19333e-06	***	0.948004	--	0.199971	0.0845451	56582.5
Norm30	CNN	8	Diploid	ADD	0.001	5.2452e-05	***	1.19333e-06	***	0.948004	--	0.118345	0.0227067	187435
Norm30	CNN	8	Diploid	ADD	0.01	5.2452e-05	***	1.19333e-06	***	0.948004	--	0.197862	0.0514957	47799.7
Norm30	CNN	10	Diploid	ADD	0.001	5.2452e-05	***	1.19333e-06	***	0.948004	--	0.168568	0.0847004	172677
Norm30	CNN	10	Diploid	ADD	0.01	5.2452e-05	***	1.19333e-06	***	0.948004	--	0.262487	0.0978592	40740.8
Norm30	CNN	12	Allele Dosage	ADD	0.001	5.2452e-05	***	1.19333e-06	***	0.948004	--	0.164257	0.0521364	177722
Norm30	CNN	12	Allele Dosage	ADD	0.01	5.2452e-05	***	1.19333e-06	***	0.948004	--	0.304539	0.0517055	43843.2
Norm30	CNN	12	Diploid	ADD	0.001	5.2452e-05	***	1.19333e-06	***	0.948004	--	0.224496	0.0656291	172734
Norm30	CNN	12	Diploid	ADD	0.01	5.2452e-05	***	1.19333e-06	***	0.948004	--	0.253923	0.105483	46492.9
Norm30	MLP	2	Diploid	ADD	0.001	0.000492582	***	3.70863e-06	***	0.520193	--	0.0937301	0.0898825	188544
Norm30	MLP	2	Diploid	ADD	0.01	0.000492582	***	3.70863e-06	***	0.520193	--	0.157347	0.0688859	51885
Norm30	MLP	4	Diploid	ADD	0.001	0.000492582	***	3.70863e-06	***	0.520193	--	0.072429	0.101819	179049
Norm30	MLP	4	Diploid	ADD	0.01	0.000492582	***	3.70863e-06	***	0.520193	--	0.11903	0.0862648	57292.7
Norm30	MLP	6	Diploid	ADD	0.001	0.000492582	***	3.70863e-06	***	0.520193	--	0.092654	0.059052	172821
Norm30	MLP	6	Diploid	ADD	0.01	0.000492582	***	3.70863e-06	***	0.520193	--	0.234023	0.0812269	41782.2
Norm30	MLP	8	Diploid	ADD	0.001	0.000492582	***	3.70863e-06	***	0.520193	--	0.136531	0.038306	175680
Norm30	MLP	8	Diploid	ADD	0.01	0.000492582	***	3.70863e-06	***	0.520193	--	0.180976	0.0576981	51894.7
Norm30	MLP	10	Diploid	ADD	0.001	0.000492582	***	3.70863e-06	***	0.520193	--	0.215623	0.0934434	167983
Norm30	MLP	10	Diploid	ADD	0.01	0.000492582	***	3.70863e-06	***	0.520193	--	0.253441	0.0903232	46914.8
Norm30	MLP	12	Allele Dosage	ADD	0.001	0.000492582	***	3.70863e-06	***	0.520193	--	0.21655	0.0623855	182710
Norm30	MLP	12	Allele Dosage	ADD	0.01	0.000492582	***	3.70863e-06	***	0.520193	--	0.307423	0.0720051	39683.3
Norm30	MLP	12	Diploid	ADD	0.001	0.000492582	***	3.70863e-06	***	0.520193	--	0.225629	0.0381737	178364
Norm30	MLP	12	Diploid	ADD	0.01	0.000492582	***	3.70863e-06	***	0.520193	--	0.265554	0.0951648	45421
Norm10	Attention	2	Diploid	ADD	0.001	3.11583e-08	***	0.000506645	***	0.205259	--	0.0470532	0.112671	58076
Norm10	Attention	2	Diploid	ADD	0.01	3.11583e-08	***	0.000506645	***	0.205259	--	0.222236	0.064772	34458.4
Norm10	Attention	4	Diploid	ADD	0.001	3.11583e-08	***	0.000506645	***	0.205259	--	0.041446	0.0620608	59162.2
Norm10	Attention	4	Diploid	ADD	0.01	3.11583e-08	***	0.000506645	***	0.205259	--	0.183104	0.0336594	30545.4
Norm10	Attention	6	Diploid	ADD	0.001	3.11583e-08	***	0.000506645	***	0.205259	--	0.175743	0.0800541	58010.4
Norm10	Attention	6	Diploid	ADD	0.01	3.11583e-08	***	0.000506645	***	0.205259	--	0.181968	0.0389843	30152
Norm10	Attention	8	Diploid	ADD	0.001	3.11583e-08	***	0.000506645	***	0.205259	--	0.101496	0.0285831	61316.9
Norm10	Attention	8	Diploid	ADD	0.01	3.11583e-08	***	0.000506645	***	0.205259	--	0.214136	0.0256972	28276.3
Norm10	Attention	10	Diploid	ADD	0.001	3.11583e-08	***	0.000506645	***	0.205259	--	0.15348	0.0574133	59034.5
Norm10	Attention	10	Diploid	ADD	0.01	3.11583e-08	***	0.000506645	***	0.205259	--	0.254849	0.0349161	27756.8
Norm10	Attention	12	Allele Dosage	ADD	0.001	3.11583e-08	***	0.000506645	***	0.205259	--	0.208768	0.0610212	56034.2
Norm10	Attention	12	Allele Dosage	ADD	0.01	3.11583e-08	***	0.000506645	***	0.205259	--	0.277674	0.0908755	29388.6
Norm10	Attention	12	Diploid	ADD	0.001	3.11583e-08	***	0.000506645	***	0.205259	--	0.172249	0.0494035	56674.7
Norm10	Attention	12	Diploid	ADD	0.01	3.11583e-08	***	0.000506645	***	0.205259	--	0.245817	0.0568409	27361.8
Norm10	CNN	2	Diploid	ADD	0.001	3.79553e-10	***	8.05699e-06	***	0.0199204	*	0.0375756	0.095223	77557
Norm10	CNN	2	Diploid	ADD	0.01	3.79553e-10	***	8.05699e-06	***	0.0199204	*	0.154185	0.037754	34313.6
Norm10	CNN	4	Diploid	ADD	0.001	3.79553e-10	***	8.05699e-06	***	0.0199204	*	0.0217734	0.0723	67563.6
Norm10	CNN	4	Diploid	ADD	0.01	3.79553e-10	***	8.05699e-06	***	0.0199204	*	0.164665	0.0293182	30674.7
Norm10	CNN	6	Diploid	ADD	0.001	3.79553e-10	***	8.05699e-06	***	0.0199204	*	0.16903	0.0656231	64698.6
Norm10	CNN	6	Diploid	ADD	0.01	3.79553e-10	***	8.05699e-06	***	0.0199204	*	0.18091	0.0434418	33451.8
Norm10	CNN	8	Diploid	ADD	0.001	3.79553e-10	***	8.05699e-06	***	0.0199204	*	0.0991716	0.0427206	60914.9
Norm10	CNN	8	Diploid	ADD	0.01	3.79553e-10	***	8.05699e-06	***	0.0199204	*	0.211263	0.0677389	29518.5
Norm10	CNN	10	Diploid	ADD	0.001	3.79553e-10	***	8.05699e-06	***	0.0199204	*	0.125106	0.0281796	62697.8
Norm10	CNN	10	Diploid	ADD	0.01	3.79553e-10	***	8.05699e-06	***	0.0199204	*	0.187989	0.0312513	27856.1
Norm10	CNN	12	Allele Dosage	ADD	0.001	3.79553e-10	***	8.05699e-06	***	0.0199204	*	0.177702	0.0500873	61462
Norm10	CNN	12	Allele Dosage	ADD	0.01	3.79553e-10	***	8.05699e-06	***	0.0199204	*	0.326474	0.0322538	40263.6
Norm10	CNN	12	Diploid	ADD	0.001	3.79553e-10	***	8.05699e-06	***	0.0199204	*	0.155524	0.0297363	61236.1
Norm10	CNN	12	Diploid	ADD	0.01	3.79553e-10	***	8.05699e-06	***	0.0199204	*	0.259271	0.0538121	27975
Norm10	MLP	2	Diploid	ADD	0.001	1.05856e-12	***	0.00639069	**	0.0206538	*	0.0938692	0.075707	59171.1
Norm10	MLP	2	Diploid	ADD	0.01	1.05856e-12	***	0.00639069	**	0.0206538	*	0.202908	0.057099	33684
Norm10	MLP	4	Diploid	ADD	0.001	1.05856e-12	***	0.00639069	**	0.0206538	*	0.0399205	0.0822704	58308.7
Norm10	MLP	4	Diploid	ADD	0.01	1.05856e-12	***	0.00639069	**	0.0206538	*	0.160128	0.0169886	31061.9
Norm10	MLP	6	Diploid	ADD	0.001	1.05856e-12	***	0.00639069	**	0.0206538	*	0.0886648	0.133034	56749.2
Norm10	MLP	6	Diploid	ADD	0.01	1.05856e-12	***	0.00639069	**	0.0206538	*	0.193234	0.044093	30169.5
Norm10	MLP	8	Diploid	ADD	0.001	1.05856e-12	***	0.00639069	**	0.0206538	*	0.0770586	0.0432215	58874.8
Norm10	MLP	8	Diploid	ADD	0.01	1.05856e-12	***	0.00639069	**	0.0206538	*	0.219766	0.0140271	33745.9
Norm10	MLP	10	Diploid	ADD	0.001	1.05856e-12	***	0.00639069	**	0.0206538	*	0.0950839	0.0720363	57695.2
Norm10	MLP	10	Diploid	ADD	0.01	1.05856e-12	***	0.00639069	**	0.0206538	*	0.267047	0.0562285	34009.8
Norm10	MLP	12	Allele Dosage	ADD	0.001	1.05856e-12	***	0.00639069	**	0.0206538	*	0.164678	0.0862699	58709.9
Norm10	MLP	12	Allele Dosage	ADD	0.01	1.05856e-12	***	0.00639069	**	0.0206538	*	0.340698	0.0436718	28323.9
Norm10	MLP	12	Diploid	ADD	0.001	1.05856e-12	***	0.00639069	**	0.0206538	*	0.110603	0.0895847	64381.7
Norm10	MLP	12	Diploid	ADD	0.01	1.05856e-12	***	0.00639069	**	0.0206538	*	0.289468	0.0609405	29330.5
Norm05	Attention	2	Diploid	ADD	0.001	0.486667	--	0.000145939	***	0.0510891	--	0.14248	0.0289547	42618.3
Norm05	Attention	2	Diploid	ADD	0.01	0.486667	--	0.000145939	***	0.0510891	--	0.154973	0.0769555	27794.5
Norm05	Attention	4	Diploid	ADD	0.001	0.486667	--	0.000145939	***	0.0510891	--	0.0783292	0.0558861	46103.2
Norm05	Attention	4	Diploid	ADD	0.01	0.486667	--	0.000145939	***	0.0510891	--	0.136567	0.0547618	27244.2
Norm05	Attention	6	Diploid	ADD	0.001	0.486667	--	0.000145939	***	0.0510891	--	0.219913	0.0782266	42400
Norm05	Attention	6	Diploid	ADD	0.01	0.486667	--	0.000145939	***	0.0510891	--	0.166644	0.0496164	23953.2
Norm05	Attention	8	Diploid	ADD	0.001	0.486667	--	0.000145939	***	0.0510891	--	0.191133	0.0573053	43643.2
Norm05	Attention	8	Diploid	ADD	0.01	0.486667	--	0.000145939	***	0.0510891	--	0.144244	0.0434904	25776.3
Norm05	Attention	10	Diploid	ADD	0.001	0.486667	--	0.000145939	***	0.0510891	--	0.191266	0.0638227	41743.9
Norm05	Attention	10	Diploid	ADD	0.01	0.486667	--	0.000145939	***	0.0510891	--	0.221057	0.065715	21559.4
Norm05	Attention	12	Allele Dosage	ADD	0.001	0.486667	--	0.000145939	***	0.0510891	--	0.274647	0.0329363	43345.5
Norm05	Attention	12	Allele Dosage	ADD	0.01	0.486667	--	0.000145939	***	0.0510891	--	0.270603	0.0857419	22429.2
Norm05	Attention	12	Diploid	ADD	0.001	0.486667	--	0.000145939	***	0.0510891	--	0.26459	0.0678938	41512.3
Norm05	Attention	12	Diploid	ADD	0.01	0.486667	--	0.000145939	***	0.0510891	--	0.194294	0.0398024	23318.3
Norm05	CNN	2	Diploid	ADD	0.001	0.214345	--	4.46281e-05	***	0.0132029	*	0.106437	0.0352004	48142.3
Norm05	CNN	2	Diploid	ADD	0.01	0.214345	--	4.46281e-05	***	0.0132029	*	0.137753	0.0673692	24984.5
Norm05	CNN	4	Diploid	ADD	0.001	0.214345	--	4.46281e-05	***	0.0132029	*	0.0525065	0.0572237	48910.2
Norm05	CNN	4	Diploid	ADD	0.01	0.214345	--	4.46281e-05	***	0.0132029	*	0.154578	0.0594383	23841.8
Norm05	CNN	6	Diploid	ADD	0.001	0.214345	--	4.46281e-05	***	0.0132029	*	0.20784	0.0385004	47366.3
Norm05	CNN	6	Diploid	ADD	0.01	0.214345	--	4.46281e-05	***	0.0132029	*	0.192021	0.0609228	22102.6
Norm05	CNN	8	Diploid	ADD	0.001	0.214345	--	4.46281e-05	***	0.0132029	*	0.154504	0.0741112	48994.8
Norm05	CNN	8	Diploid	ADD	0.01	0.214345	--	4.46281e-05	***	0.0132029	*	0.192123	0.0812289	23921.3
Norm05	CNN	10	Diploid	ADD	0.001	0.214345	--	4.46281e-05	***	0.0132029	*	0.188358	0.0430747	44793.7
Norm05	CNN	10	Diploid	ADD	0.01	0.214345	--	4.46281e-05	***	0.0132029	*	0.149797	0.0442483	22390.9
Norm05	CNN	12	Allele Dosage	ADD	0.001	0.214345	--	4.46281e-05	***	0.0132029	*	0.259216	0.0277569	43608.4
Norm05	CNN	12	Allele Dosage	ADD	0.01	0.214345	--	4.46281e-05	***	0.0132029	*	0.291652	0.0279394	21625
Norm05	CNN	12	Diploid	ADD	0.001	0.214345	--	4.46281e-05	***	0.0132029	*	0.238726	0.0329898	44141.7
Norm05	CNN	12	Diploid	ADD	0.01	0.214345	--	4.46281e-05	***	0.0132029	*	0.215913	0.0712321	27719
Norm05	MLP	2	Diploid	ADD	0.001	0.00248904	**	0.0049781	**	0.00192497	**	0.109919	0.0765721	44078.4
Norm05	MLP	2	Diploid	ADD	0.01	0.00248904	**	0.0049781	**	0.00192497	**	0.166812	0.0583985	26473.3
Norm05	MLP	4	Diploid	ADD	0.001	0.00248904	**	0.0049781	**	0.00192497	**	0.0701364	0.114202	43216.7
Norm05	MLP	4	Diploid	ADD	0.01	0.00248904	**	0.0049781	**	0.00192497	**	0.132076	0.0465182	26941.7
Norm05	MLP	6	Diploid	ADD	0.001	0.00248904	**	0.0049781	**	0.00192497	**	0.149746	0.0967111	44505.8
Norm05	MLP	6	Diploid	ADD	0.01	0.00248904	**	0.0049781	**	0.00192497	**	0.199593	0.0475339	21905.5
Norm05	MLP	8	Diploid	ADD	0.001	0.00248904	**	0.0049781	**	0.00192497	**	0.154135	0.0617945	43945.1
Norm05	MLP	8	Diploid	ADD	0.01	0.00248904	**	0.0049781	**	0.00192497	**	0.175063	0.075997	27359.8
Norm05	MLP	10	Diploid	ADD	0.001	0.00248904	**	0.0049781	**	0.00192497	**	0.181128	0.0438808	44762.8
Norm05	MLP	10	Diploid	ADD	0.01	0.00248904	**	0.0049781	**	0.00192497	**	0.211437	0.0525972	23921.9
Norm05	MLP	12	Allele Dosage	ADD	0.001	0.00248904	**	0.0049781	**	0.00192497	**	0.255846	0.0574563	41725.7
Norm05	MLP	12	Allele Dosage	ADD	0.01	0.00248904	**	0.0049781	**	0.00192497	**	0.314835	0.0940732	31162.5
Norm05	MLP	12	Diploid	ADD	0.001	0.00248904	**	0.0049781	**	0.00192497	**	0.147427	0.0540234	42723.4
Norm05	MLP	12	Diploid	ADD	0.01	0.00248904	**	0.0049781	**	0.00192497	**	0.230858	0.0728385	28297.6
Gamma100	Attention	2	Diploid	Ex	0.001	0.154286	--	0.0027687	**	2.28901e-10	***	0.137898	0.0384862	18825.4
Gamma100	Attention	2	Diploid	Ex	0.01	0.154286	--	0.0027687	**	2.28901e-10	***	0.123304	0.0354649	29793.2
Gamma100	Attention	4	Diploid	Ex	0.001	0.154286	--	0.0027687	**	2.28901e-10	***	0.125005	0.0415507	18712.2
Gamma100	Attention	4	Diploid	Ex	0.01	0.154286	--	0.0027687	**	2.28901e-10	***	0.13064	0.0777384	22171.4
Gamma100	Attention	6	Diploid	Ex	0.001	0.154286	--	0.0027687	**	2.28901e-10	***	0.167024	0.0739154	18745.4
Gamma100	Attention	6	Diploid	Ex	0.01	0.154286	--	0.0027687	**	2.28901e-10	***	0.119173	0.095397	22339.6
Gamma100	Attention	8	Diploid	Ex	0.001	0.154286	--	0.0027687	**	2.28901e-10	***	0.133859	0.033195	19043.4
Gamma100	Attention	8	Diploid	Ex	0.01	0.154286	--	0.0027687	**	2.28901e-10	***	0.164957	0.0613271	22083.8
Gamma100	Attention	10	Diploid	Ex	0.001	0.154286	--	0.0027687	**	2.28901e-10	***	0.197159	0.0713536	18765.4
Gamma100	Attention	10	Diploid	Ex	0.01	0.154286	--	0.0027687	**	2.28901e-10	***	0.169044	0.0488093	23648.5
Gamma100	Attention	12	Allele Dosage	Ex	0.001	0.154286	--	0.0027687	**	2.28901e-10	***	0.370685	0.050229	16979.4
Gamma100	Attention	12	Allele Dosage	Ex	0.01	0.154286	--	0.0027687	**	2.28901e-10	***	0.320458	0.0370418	18969.5
Gamma100	Attention	12	Diploid	Ex	0.001	0.154286	--	0.0027687	**	2.28901e-10	***	0.200408	0.0577393	18911.2
Gamma100	Attention	12	Diploid	Ex	0.01	0.154286	--	0.0027687	**	2.28901e-10	***	0.17229	0.0289847	21317.9
Gamma100	CNN	2	Diploid	Ex	0.001	0.979623	--	0.00724495	**	5.34139e-08	***	0.120141	0.0252587	24461.8
Gamma100	CNN	2	Diploid	Ex	0.01	0.979623	--	0.00724495	**	5.34139e-08	***	0.113798	0.0212785	23444.4
Gamma100	CNN	4	Diploid	Ex	0.001	0.979623	--	0.00724495	**	5.34139e-08	***	0.150194	0.0814142	21053
Gamma100	CNN	4	Diploid	Ex	0.01	0.979623	--	0.00724495	**	5.34139e-08	***	0.152386	0.0755901	21831.4
Gamma100	CNN	6	Diploid	Ex	0.001	0.979623	--	0.00724495	**	5.34139e-08	***	0.134538	0.0899314	20691
Gamma100	CNN	6	Diploid	Ex	0.01	0.979623	--	0.00724495	**	5.34139e-08	***	0.128358	0.0324069	20916.1
Gamma100	CNN	8	Diploid	Ex	0.001	0.979623	--	0.00724495	**	5.34139e-08	***	0.146333	0.0161928	19819.9
Gamma100	CNN	8	Diploid	Ex	0.01	0.979623	--	0.00724495	**	5.34139e-08	***	0.138059	0.0775111	19741.6
Gamma100	CNN	10	Diploid	Ex	0.001	0.979623	--	0.00724495	**	5.34139e-08	***	0.177551	0.0705412	19670.1
Gamma100	CNN	10	Diploid	Ex	0.01	0.979623	--	0.00724495	**	5.34139e-08	***	0.191616	0.0708462	18419.3
Gamma100	CNN	12	Allele Dosage	Ex	0.001	0.979623	--	0.00724495	**	5.34139e-08	***	0.355759	0.08333	20324.4
Gamma100	CNN	12	Allele Dosage	Ex	0.01	0.979623	--	0.00724495	**	5.34139e-08	***	0.323792	0.0773139	24643.1
Gamma100	CNN	12	Diploid	Ex	0.001	0.979623	--	0.00724495	**	5.34139e-08	***	0.169246	0.0793927	19824.1
Gamma100	CNN	12	Diploid	Ex	0.01	0.979623	--	0.00724495	**	5.34139e-08	***	0.208505	0.0737473	23810.6
Gamma100	MLP	2	Diploid	Ex	0.001	0.000216113	***	0.0207853	*	6.55042e-07	***	0.126965	0.0260851	20027.7
Gamma100	MLP	2	Diploid	Ex	0.01	0.000216113	***	0.0207853	*	6.55042e-07	***	0.128871	0.0312123	24464.6
Gamma100	MLP	4	Diploid	Ex	0.001	0.000216113	***	0.0207853	*	6.55042e-07	***	0.0464416	0.0450073	19810.8
Gamma100	MLP	4	Diploid	Ex	0.01	0.000216113	***	0.0207853	*	6.55042e-07	***	0.139111	0.0658564	24324.2
Gamma100	MLP	6	Diploid	Ex	0.001	0.000216113	***	0.0207853	*	6.55042e-07	***	0.0875511	0.0655079	19091.1
Gamma100	MLP	6	Diploid	Ex	0.01	0.000216113	***	0.0207853	*	6.55042e-07	***	0.147039	0.0511027	20630.9
Gamma100	MLP	8	Diploid	Ex	0.001	0.000216113	***	0.0207853	*	6.55042e-07	***	0.0803871	0.0628426	19665.1
Gamma100	MLP	8	Diploid	Ex	0.01	0.000216113	***	0.0207853	*	6.55042e-07	***	0.137322	0.0599565	23828.8
Gamma100	MLP	10	Diploid	Ex	0.001	0.000216113	***	0.0207853	*	6.55042e-07	***	0.109817	0.0770688	20702.3
Gamma100	MLP	10	Diploid	Ex	0.01	0.000216113	***	0.0207853	*	6.55042e-07	***	0.202062	0.048948	20279.6
Gamma100	MLP	12	Allele Dosage	Ex	0.001	0.000216113	***	0.0207853	*	6.55042e-07	***	0.259036	0.114928	19043.4
Gamma100	MLP	12	Allele Dosage	Ex	0.01	0.000216113	***	0.0207853	*	6.55042e-07	***	0.321706	0.0466703	21041
Gamma100	MLP	12	Diploid	Ex	0.001	0.000216113	***	0.0207853	*	6.55042e-07	***	0.148727	0.082887	19042.9
Gamma100	MLP	12	Diploid	Ex	0.01	0.000216113	***	0.0207853	*	6.55042e-07	***	0.190762	0.0459188	25986
Log100	Attention	2	Diploid	Ex	0.001	9.20304e-07	***	0.361282	--	0.000114608	***	0.15284	0.093705	2981.44
Log100	Attention	2	Diploid	Ex	0.01	9.20304e-07	***	0.361282	--	0.000114608	***	0.0690936	0.0431075	4201.36
Log100	Attention	4	Diploid	Ex	0.001	9.20304e-07	***	0.361282	--	0.000114608	***	0.146458	0.0297633	2999.4
Log100	Attention	4	Diploid	Ex	0.01	9.20304e-07	***	0.361282	--	0.000114608	***	0.0847727	0.0619181	3574.74
Log100	Attention	6	Diploid	Ex	0.001	9.20304e-07	***	0.361282	--	0.000114608	***	0.182908	0.0649617	2985.99
Log100	Attention	6	Diploid	Ex	0.01	9.20304e-07	***	0.361282	--	0.000114608	***	0.0784422	0.0738407	3426.98
Log100	Attention	8	Diploid	Ex	0.001	9.20304e-07	***	0.361282	--	0.000114608	***	0.161469	0.0375395	3233.42
Log100	Attention	8	Diploid	Ex	0.01	9.20304e-07	***	0.361282	--	0.000114608	***	0.0281684	0.0806298	3446.44
Log100	Attention	10	Diploid	Ex	0.001	9.20304e-07	***	0.361282	--	0.000114608	***	0.159806	0.0452272	2947.9
Log100	Attention	10	Diploid	Ex	0.01	9.20304e-07	***	0.361282	--	0.000114608	***	0.135911	0.0535464	3222.72
Log100	Attention	12	Allele Dosage	Ex	0.001	9.20304e-07	***	0.361282	--	0.000114608	***	0.268411	0.0405645	3130.32
Log100	Attention	12	Allele Dosage	Ex	0.01	9.20304e-07	***	0.361282	--	0.000114608	***	0.184887	0.0585983	3237.1
Log100	Attention	12	Diploid	Ex	0.001	9.20304e-07	***	0.361282	--	0.000114608	***	0.151341	0.0652498	3069.36
Log100	Attention	12	Diploid	Ex	0.01	9.20304e-07	***	0.361282	--	0.000114608	***	0.104	0.0505198	3360.38
Log100	CNN	2	Diploid	Ex	0.001	0.258773	--	0.162415	--	0.000110686	***	0.159629	0.0745402	3422.98
Log100	CNN	2	Diploid	Ex	0.01	0.258773	--	0.162415	--	0.000110686	***	0.169326	0.0400378	3582.91
Log100	CNN	4	Diploid	Ex	0.001	0.258773	--	0.162415	--	0.000110686	***	0.129991	0.0364447	3296.09
Log100	CNN	4	Diploid	Ex	0.01	0.258773	--	0.162415	--	0.000110686	***	0.13292	0.04684	3309.72
Log100	CNN	6	Diploid	Ex	0.001	0.258773	--	0.162415	--	0.000110686	***	0.180669	0.0596476	3888.87
Log100	CNN	6	Diploid	Ex	0.01	0.258773	--	0.162415	--	0.000110686	***	0.157552	0.10062	3152.79
Log100	CNN	8	Diploid	Ex	0.001	0.258773	--	0.162415	--	0.000110686	***	0.171987	0.0443242	3942.76
Log100	CNN	8	Diploid	Ex	0.01	0.258773	--	0.162415	--	0.000110686	***	0.117133	0.0719958	3744.82
Log100	CNN	10	Diploid	Ex	0.001	0.258773	--	0.162415	--	0.000110686	***	0.0924056	0.131251	3098.1
Log100	CNN	10	Diploid	Ex	0.01	0.258773	--	0.162415	--	0.000110686	***	0.108203	0.0889621	3402.97
Log100	CNN	12	Allele Dosage	Ex	0.001	0.258773	--	0.162415	--	0.000110686	***	0.26969	0.0716046	3132.43
Log100	CNN	12	Allele Dosage	Ex	0.01	0.258773	--	0.162415	--	0.000110686	***	0.205458	0.0729931	3073.84
Log100	CNN	12	Diploid	Ex	0.001	0.258773	--	0.162415	--	0.000110686	***	0.146071	0.0459704	3477.76
Log100	CNN	12	Diploid	Ex	0.01	0.258773	--	0.162415	--	0.000110686	***	0.121795	0.0916303	3326.13
Log100	MLP	2	Diploid	Ex	0.001	0.0289506	*	0.231745	--	2.19263e-06	***	0.0633939	0.116776	3093.59
Log100	MLP	2	Diploid	Ex	0.01	0.0289506	*	0.231745	--	2.19263e-06	***	0.118259	0.0557389	3652.52
Log100	MLP	4	Diploid	Ex	0.001	0.0289506	*	0.231745	--	2.19263e-06	***	0.153794	0.0271546	3404.41
Log100	MLP	4	Diploid	Ex	0.01	0.0289506	*	0.231745	--	2.19263e-06	***	0.13461	0.053542	3824.06
Log100	MLP	6	Diploid	Ex	0.001	0.0289506	*	0.231745	--	2.19263e-06	***	0.128563	0.0509038	3168.96
Log100	MLP	6	Diploid	Ex	0.01	0.0289506	*	0.231745	--	2.19263e-06	***	0.163856	0.083177	3573.59
Log100	MLP	8	Diploid	Ex	0.001	0.0289506	*	0.231745	--	2.19263e-06	***	0.0920797	0.0669917	3303.4
Log100	MLP	8	Diploid	Ex	0.01	0.0289506	*	0.231745	--	2.19263e-06	***	0.117896	0.0688536	3303.4
Log100	MLP	10	Diploid	Ex	0.001	0.0289506	*	0.231745	--	2.19263e-06	***	0.0637042	0.0932075	3036.74
Log100	MLP	10	Diploid	Ex	0.01	0.0289506	*	0.231745	--	2.19263e-06	***	0.129087	0.0486305	3489.25
Log100	MLP	12	Allele Dosage	Ex	0.001	0.0289506	*	0.231745	--	2.19263e-06	***	0.229663	0.0699093	3115.86
Log100	MLP	12	Allele Dosage	Ex	0.01	0.0289506	*	0.231745	--	2.19263e-06	***	0.260045	0.0849577	2994.59
Log100	MLP	12	Diploid	Ex	0.001	0.0289506	*	0.231745	--	2.19263e-06	***	0.0365785	0.11144	3501.03
Log100	MLP	12	Diploid	Ex	0.01	0.0289506	*	0.231745	--	2.19263e-06	***	0.123416	0.0737535	4263.01
Sigmoid100	Attention	2	Diploid	Ex	0.001	0.00963741	**	0.801285	--	0.00692173	**	0.0239452	0.0563752	33.6915
Sigmoid100	Attention	2	Diploid	Ex	0.01	0.00963741	**	0.801285	--	0.00692173	**	0.0664739	0.0540414	48.612
Sigmoid100	Attention	4	Diploid	Ex	0.001	0.00963741	**	0.801285	--	0.00692173	**	0.146247	0.0584911	42.2755
Sigmoid100	Attention	4	Diploid	Ex	0.01	0.00963741	**	0.801285	--	0.00692173	**	0.077182	0.0621571	38.3529
Sigmoid100	Attention	6	Diploid	Ex	0.001	0.00963741	**	0.801285	--	0.00692173	**	0.119503	0.0654314	35.6144
Sigmoid100	Attention	6	Diploid	Ex	0.01	0.00963741	**	0.801285	--	0.00692173	**	0.0877776	0.060818	37.6045
Sigmoid100	Attention	8	Diploid	Ex	0.001	0.00963741	**	0.801285	--	0.00692173	**	0.19041	0.127599	33.0277
Sigmoid100	Attention	8	Diploid	Ex	0.01	0.00963741	**	0.801285	--	0.00692173	**	0.1156	0.0870618	36.2167
Sigmoid100	Attention	10	Diploid	Ex	0.001	0.00963741	**	0.801285	--	0.00692173	**	0.110915	0.0335903	34.1416
Sigmoid100	Attention	10	Diploid	Ex	0.01	0.00963741	**	0.801285	--	0.00692173	**	0.0600753	0.0404882	36.7597
Sigmoid100	Attention	12	Allele Dosage	Ex	0.001	0.00963741	**	0.801285	--	0.00692173	**	0.234931	0.0836886	35.3091
Sigmoid100	Attention	12	Allele Dosage	Ex	0.01	0.00963741	**	0.801285	--	0.00692173	**	0.121337	0.0801396	41.8531
Sigmoid100	Attention	12	Diploid	Ex	0.001	0.00963741	**	0.801285	--	0.00692173	**	0.0787658	0.0479825	35.9429
Sigmoid100	Attention	12	Diploid	Ex	0.01	0.00963741	**	0.801285	--	0.00692173	**	0.0433282	0.0298902	39.2105
Sigmoid100	CNN	2	Diploid	Ex	0.001	0.101567	--	0.119589	--	3.38283e-07	***	0.00254512	0.0652683	39.8626
Sigmoid100	CNN	2	Diploid	Ex	0.01	0.101567	--	0.119589	--	3.38283e-07	***	-0.00401596	0.102478	46.1751
Sigmoid100	CNN	4	Diploid	Ex	0.001	0.101567	--	0.119589	--	3.38283e-07	***	0.118734	0.0674683	38.8658
Sigmoid100	CNN	4	Diploid	Ex	0.01	0.101567	--	0.119589	--	3.38283e-07	***	0.0832834	0.0484649	33.3091
Sigmoid100	CNN	6	Diploid	Ex	0.001	0.101567	--	0.119589	--	3.38283e-07	***	0.142862	0.0887533	36.0212
Sigmoid100	CNN	6	Diploid	Ex	0.01	0.101567	--	0.119589	--	3.38283e-07	***	0.12174	0.0459006	81.2032
Sigmoid100	CNN	8	Diploid	Ex	0.001	0.101567	--	0.119589	--	3.38283e-07	***	0.230771	0.113884	32.7063
Sigmoid100	CNN	8	Diploid	Ex	0.01	0.101567	--	0.119589	--	3.38283e-07	***	0.149883	0.0974162	34.6538
Sigmoid100	CNN	10	Diploid	Ex	0.001	0.101567	--	0.119589	--	3.38283e-07	***	0.0992715	0.0542508	37.3517
Sigmoid100	CNN	10	Diploid	Ex	0.01	0.101567	--	0.119589	--	3.38283e-07	***	0.0473506	0.0364137	36.8454
Sigmoid100	CNN	12	Allele Dosage	Ex	0.001	0.101567	--	0.119589	--	3.38283e-07	***	0.310553	0.0649751	34.3638
Sigmoid100	CNN	12	Allele Dosage	Ex	0.01	0.101567	--	0.119589	--	3.38283e-07	***	0.326385	0.0887615	35.6884
Sigmoid100	CNN	12	Diploid	Ex	0.001	0.101567	--	0.119589	--	3.38283e-07	***	0.111361	0.0517427	35.3657
Sigmoid100	CNN	12	Diploid	Ex	0.01	0.101567	--	0.119589	--	3.38283e-07	***	0.0451488	0.0774764	155.656
Sigmoid100	MLP	2	Diploid	Ex	0.001	0.505471	--	0.092416	--	0.0070286	**	-0.0228072	0.0485292	36.7413
Sigmoid100	MLP	2	Diploid	Ex	0.01	0.505471	--	0.092416	--	0.0070286	**	0.0195188	0.100506	43.8482
Sigmoid100	MLP	4	Diploid	Ex	0.001	0.505471	--	0.092416	--	0.0070286	**	0.128285	0.0664644	35.9416
Sigmoid100	MLP	4	Diploid	Ex	0.01	0.505471	--	0.092416	--	0.0070286	**	0.132559	0.0402649	35.1457
Sigmoid100	MLP	6	Diploid	Ex	0.001	0.505471	--	0.092416	--	0.0070286	**	0.149917	0.0794988	34.8375
Sigmoid100	MLP	6	Diploid	Ex	0.01	0.505471	--	0.092416	--	0.0070286	**	0.133095	0.0355856	40.4529
Sigmoid100	MLP	8	Diploid	Ex	0.001	0.505471	--	0.092416	--	0.0070286	**	0.209408	0.105587	31.989
Sigmoid100	MLP	8	Diploid	Ex	0.01	0.505471	--	0.092416	--	0.0070286	**	0.181877	0.0656921	33.0807
Sigmoid100	MLP	10	Diploid	Ex	0.001	0.505471	--	0.092416	--	0.0070286	**	0.119673	0.0567838	35.4691
Sigmoid100	MLP	10	Diploid	Ex	0.01	0.505471	--	0.092416	--	0.0070286	**	0.0533223	0.129969	1324.45
Sigmoid100	MLP	12	Allele Dosage	Ex	0.001	0.505471	--	0.092416	--	0.0070286	**	0.256782	0.0531074	39.022
Sigmoid100	MLP	12	Allele Dosage	Ex	0.01	0.505471	--	0.092416	--	0.0070286	**	0.213108	0.0731138	35.8139
Sigmoid100	MLP	12	Diploid	Ex	0.001	0.505471	--	0.092416	--	0.0070286	**	0.0919308	0.0544223	36.1019
Sigmoid100	MLP	12	Diploid	Ex	0.01	0.505471	--	0.092416	--	0.0070286	**	0.0987215	0.0863884	86.6594
