# Supplementary figures and images for: The impact of genotype transformations and aneuploidy on genomic prediction accuracy in polyploid species: a simulation study
Source: Research Square preprint supplement (doi:10.21203/rs.3.rs-5365958/v1), 2024-11-26

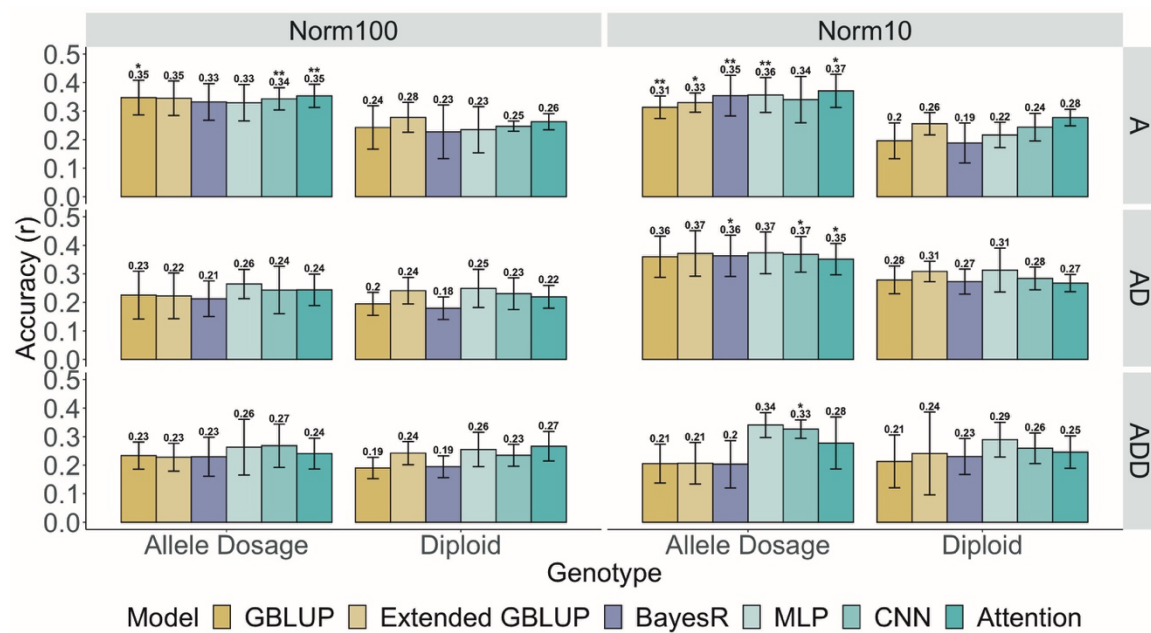

Appendix Figure 1 Accuracies of genomic prediction from six models.

Supplement: Supplementary file 1 [file 51ae800adbe33b81d17d9d8f.pdf]
